# Supplementary material for: FeCl3-promoted regioselective synthesis of BODIPY dimers through oxidative aromatic homocoupling reactions
Source: Royal Society of Chemistry journal article supplement (doi:10.1039/d1cc04098g), 2021-01-01
Supplement: d1cc04098g1.pdf [file d1cc04098g1.pdf]

*Supporting Information for*

## **FeCl<sub>3</sub>-Promoted Regioselective Synthesis of BODIPY Dimers through Oxidative Aromatic Homocoupling Reactions**

*Zhengxin Kang,<sup>a</sup> Qinghua Wu,<sup>a,b\*</sup> Xing Guo,<sup>a</sup> Long Wang,<sup>a</sup> Yin Ye,<sup>a</sup> Changjiang Yu,<sup>a</sup> Hua Wang,<sup>a</sup>*

*Erhong Hao,<sup>a\*</sup> and Lijuan Jiao<sup>a\*</sup>*

<sup>a</sup> *Key Laboratory of Functional Molecular Solids, Ministry of Education; School of Chemistry and Materials Science, Anhui Normal University, Wuhu, 241002, China.*

<sup>b</sup> *School of Pharmaceutical Sciences, Anhui University of Chinese Medicine, Hefei, 230012, China.*

\*To whom correspondence should be addressed.

E-mail: [wu900801@ahnu.edu.cn](mailto:wu900801@ahnu.edu.cn), [haoehong@ahnu.edu.cn](mailto:haoehong@ahnu.edu.cn), [jiao421@ahnu.edu.cn](mailto:jiao421@ahnu.edu.cn)

### **Contents**

|                                                                      |     |
|----------------------------------------------------------------------|-----|
| 1. General information .....                                         | S1  |
| 2. Synthesis and characterization.....                               | S3  |
| 3. Crystal data.....                                                 | S7  |
| 4. Photophysical data.....                                           | S10 |
| 5. Electrochemical date.....                                         | S14 |
| 6. DFT calculation.....                                              | S15 |
| 7. Cellular study.....                                               | S22 |
| 8. <sup>1</sup> H and <sup>13</sup> C NMR for all new compounds..... | S23 |
| 9. High resolution mass spectrosopes for all new compounds.....      | S30 |
| 10. References.....                                                  | S37 |

## 1. Experimental details

**General information.** Reagents and solvents were used as received from commercial suppliers (Energy Chemicals, Shanghai, China) unless noted otherwise. All reactions were performed in oven-dried or flame-dried glassware unless stated otherwise and were monitored by TLC using 0.25 mm silica gel plates with UV indicator (60F-254).  $^1\text{H}$  and  $^{13}\text{C}$  spectra were recorded on a 300 or 400 or 500 MHz NMR spectrometer at room temperature. Chemical shifts ( $\delta$ ) are given in ppm relative to  $\text{CDCl}_3$  (7.26 ppm for  $^1\text{H}$  and 77 ppm for  $^{13}\text{C}$ ) or to internal TMS. High-resolution mass spectra (HRMS) were obtained using APCI-TOF or ESI-TOF in positive mode.

**Absorption and emission measurements.** UV-visible absorption and fluorescence emission spectra were recorded on commercial spectrophotometers (Shimadzu UV-2450 and Edinburgh FS5 spectrometers). All measurements were made at 25 °C, using 5 × 10 mm cuvettes. Relative fluorescence quantum efficiencies of BODIPY derivatives were obtained by comparing the areas under the corrected emission spectrum of the test sample in various solvents with 1,7-diphenyl-3,5-di(4-methoxyphenyl)-azadipyrromethene ( $\Phi = 0.36$  in chloroform)<sup>1</sup> and Indocyanine Green ( $\Phi = 0.12$  in DMSO).<sup>2</sup> Non-degassed, spectroscopic grade solvents and a 10 mm quartz cuvette were used. Dilute solutions ( $0.01 < A < 0.05$ ) were used to minimize the reabsorption effects. Quantum yields were determined using the following equation<sup>2</sup>:

$$\Phi_X = \Phi_S (I_X/I_S) (A_S/A_X) (n_X/n_S)^2 \dots \dots \dots (1)$$

Where  $\Phi_S$  stands for the reported quantum yield of the standard, I stands for the integrated emission spectra, A stands for the absorbance at the excitation wavelength and  $n$  stands for the refractive index of the solvent being used. X subscript stands for the test sample, and S subscript stands for the standard.

**X-ray structure analysis.** Crystals of compounds **2c** and **2e** suitable for X-ray analysis were obtained *via* the slow diffusion of petroleum ether into their dichloromethane solutions. The vial containing this solution was placed, loosely capped, to promote the crystallization. A suitable crystal was chosen and mounted on a glass fiber using grease. Data were collected using a diffractometer equipped with a graphite crystal monochromator situated in the incident beam for data collection at room temperature. Cell parameters were retrieved using SMART<sup>4</sup> software and refined using SAINT on all observed reflections. The determination of unit cell parameters and data collections were performed with Mo  $K\alpha$  radiation ( $\lambda$ ) at 0.71073 Å. Data reduction was performed using the SAINT software,<sup>5</sup> which corrects for Lp and decay. The structure was solved by the direct method using the

SHELXS-97<sup>4</sup> program and refined by least squares method on  $F^2$ , SHELXL-2018/3,<sup>6</sup> incorporated in SHELXTL V5.10.<sup>7</sup> CCDC-2053912 (**2c**) and CCDC-2095140 (**2e**) containing the supplementary crystallographic data for this paper. These data can be obtained free of charge from The Cambridge Crystallographic Data Centre *via* [www.ccdc.cam.ac.uk/data\\_request/cif](http://www.ccdc.cam.ac.uk/data_request/cif).

**Electrochemical measurements.** Cyclic voltammograms of 1 mM **M**, **1a** and **2a** were measured in dichloromethane solution, containing 0.1 M TBAPF<sub>6</sub> as the supporting electrolyte, glassy carbon electrode as a working electrode, Pt wire as a counter electrode, and saturated calomel electrode (SCE) as reference electrode at 100 mV s<sup>-1</sup> of scanning rate at room temperature.

**Cell culture.** HeLa cells (human cervical cancer cells) were cultured in culture media (RPMI-1640, supplemented with 10% FBS and 1% penicillin/streptomycin solution) at 37 °C in an atmosphere of 5% CO<sub>2</sub> and 95% humidified atmosphere for 24 h.

**Cell incubation and colocalization imaging.** A total of 30000 HeLa cells were seeded into a glass bottom dish and were cultured in culture media (RPMI-1640, supplemented with 10% FBS and 1% penicillin and streptomycin) at 37 °C in an atmosphere of 5% CO<sub>2</sub> and 95% humidified atmosphere for 24 h. HeLa cells were first stained with **2g** micelles (3 μM) and LysoTracker™ Green DND-26 (1 μM) at 37 °C in an atmosphere of 5% CO<sub>2</sub> for 2 h. After washing the plates two times with PBS, the cells were fixed by 4% formaldehyde for 20 min. The organelle tracer 4,6-diamidino-2-phenylindole (DAPI, 0.08 μg/mL) was added subsequently and was incubated for 30 min to stain the nucleus. Finally, the plates were washed again with PBS and the morphologies of the HeLa cells were observed using a confocal fluorescence microscope (Leica Microsystems SP8 MP).

**Cytotoxicity determined by the CCK-8 method.** The cytotoxicity of the **2g** was evaluated on HeLa cells. These cells were seeded into 96-well plates with a density of 5000 cells per well and cultured overnight. Then, solutions of **2g** with a series of different concentrations were added and incubated with cells for 24 h. Every experiment was performed for at least six times. The working solutions were then removed, and the cells were washed with PBS buffer for one times. A total of 10 μL of CCK-8 (Cell Counting Kit-8, BIOMIKY) was added into each well, and the cells were further incubated at 37 °C for 40 min. Then the plate was shaken for 5 min (protect from light), and the absorbance at 450 nm was measured with a microplate reader (Multiskan Sky).

## 2. Synthesis and characterization

BODIPYs **1a-d** and **1e** were synthesized according to our previously reported literature.<sup>8,9</sup>

### Synthesis of dimers **2a-d**.

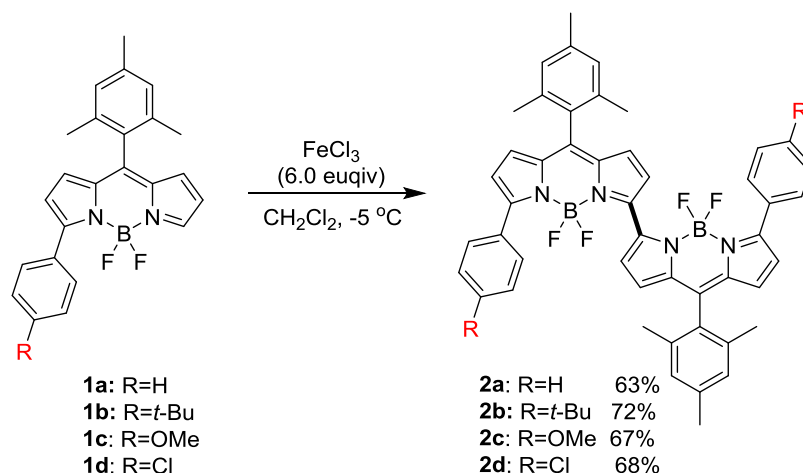

Syntheses of BODIPY **2a**: To **1a** (77 mg, 0.2 mmol) in 10 mL of fresh dried dichloromethane was drop wisely added FeCl<sub>3</sub> (194 mg, 1.2 mmol, 6.0 eq) in 1 mL of CH<sub>3</sub>NO<sub>2</sub>. The reaction mixture was stirred at -5 °C for 30 minute, and was quenched by adding saturated aqueous solution of NaHCO<sub>3</sub>. The reaction mixture was diluted with dichloromethane, washed twice with water, dried over anhydrous Na<sub>2</sub>SO<sub>4</sub>, and evaporated under vacuum. The residue was purified by column chromatography on silica gel with CH<sub>2</sub>Cl<sub>2</sub>/petroleum ether as eluent to give the desired **2a** in 63% isolated yield (49 mg). <sup>1</sup>H NMR (300 MHz, CDCl<sub>3</sub>) δ 7.91 – 7.88 (m, 4H), 7.42 (d, *J* = 3.9 Hz, 8H), 6.97 (s, 4H), 6.68 (d, *J* = 4.2 Hz, 2H), 6.58 (d, *J* = 3.6 Hz, 4H), 2.37 (s, 6H), 2.19 (s, 12H). <sup>13</sup>C NMR (125 MHz, CDCl<sub>3</sub>) δ 160.2, 147.3, 143.7, 138.6, 137.8, 137.4, 136.9, 132.4, 130.3, 130.2, 129.8, 129.6, 128.2, 128.1, 128.0, 124.5, 121.7, 21.7, 20.3. HRMS (APCI) *m/z*: Calcd for C<sub>48</sub>H<sub>41</sub>N<sub>4</sub>B<sub>2</sub>F<sub>4</sub><sup>+</sup> [M+H]<sup>+</sup> 771.3448, Found 771.3449.

Syntheses of BODIPY **2b**: BODIPY **2b** was prepared in 72% yield (64 mg) from BODIPY **1b** (83 mg, 0.2 mmol) using the same procedure described for **2a**. <sup>1</sup>H NMR (500 MHz, CDCl<sub>3</sub>) δ 7.86 (d, *J* = 8.5 Hz, 4H), 7.44 (d, *J* = 8.5 Hz, 4H), 7.40 (d, *J* = 4.5 Hz, 2H), 6.97 (s, 4H), 6.67 (d, *J* = 4.5 Hz, 2H), 6.59 (d, *J* = 4.5 Hz, 2H), 6.58 (d, *J* = 4.5 Hz, 2H), 2.37 (s, 6H), 2.20 (s, 12H), 1.33 (s, 18H). <sup>13</sup>C NMR (125 MHz, CDCl<sub>3</sub>) δ 160.5, 153.1, 147.0, 142.9, 138.5, 137.9, 137.2, 136.9, 130.4, 130.2, 129.4, 128.2, 128.1, 127.5, 125.3, 124.3, 121.9, 34.8, 31.1, 21.2, 20.4. HRMS (APCI) *m/z*: Calcd for

$C_{56}H_{57}B_2F_4N_4^+ [M+H]^+$  883.4700, Found 883.4711.

Syntheses of BODIPY **2c**: BODIPY **2c** was prepared in 67% yield (56 mg) from BODIPY **1c** (88 mg, 0.2 mmol) using the same procedure described for **2a**.  $^1H$  NMR (500 MHz,  $CDCl_3$ )  $\delta$  7.91 (d,  $J = 8.5$  Hz, 4H), 7.38 (d,  $J = 4.0$  Hz, 2H), 6.97 (s, 4H), 6.94 (d,  $J = 9.0$  Hz, 4H), 6.66 (d,  $J = 4.5$  Hz, 2H), 6.58 (d,  $J = 4.5$  Hz, 2H), 6.55 (d,  $J = 4.5$  Hz, 2H), 3.84 (s, 6H), 2.37 (s, 6H), 2.19 (s, 12H).  $^{13}C$  NMR (125 MHz,  $CDCl_3$ )  $\delta$  161.7, 161.1, 144.7, 141.4, 138.9, 138.1, 137.0, 134.4, 131.9, 131.7, 130.6, 128.5, 127.6, 124.8, 121.4, 117.9, 114.3, 55.7, 21.5, 20.4. HRMS (APCI)  $m/z$ : Calcd for  $C_{50}H_{45}O_2N_4B_2F_4^+ [M+H]^+$  831.3659, Found 831.3648.

Syntheses of BODIPY **2d**: BODIPY **2d** was prepared in 68% yield (57 mg) from BODIPY **1d** (84 mg, 0.2 mmol) using the same procedure described for **2a**.  $^1H$  NMR (500 MHz,  $CDCl_3$ )  $\delta$  7.84 (d,  $J = 8.5$  Hz, 4H), 7.39 (d,  $J = 8.5$  Hz, 4H), 7.37 (d,  $J = 4.5$  Hz, 2H), 6.98 (s, 4H), 6.69 (d,  $J = 4.3$  Hz, 2H), 6.62 (d,  $J = 4.5$  Hz, 2H), 6.56 (d,  $J = 4.3$  Hz, 2H), 2.38 (s, 6H), 2.19 (s, 12H).  $^{13}C$  NMR (125 MHz,  $CDCl_3$ )  $\delta$  158.9, 148.0, 144.5, 139.2, 138.2, 137.9, 137.2, 136.4, 131.3, 131.2, 130.6, 130.5, 128.9, 128.8, 128.6, 125.1, 121.8, 21.6, 20.7. HRMS (APCI)  $m/z$ : Calcd for  $C_{48}H_{39}N_4B_2Cl_2F_4^+ [M+H]^+$  839.2674, Found 839.2673

### Syntheses of dimer **2e**.

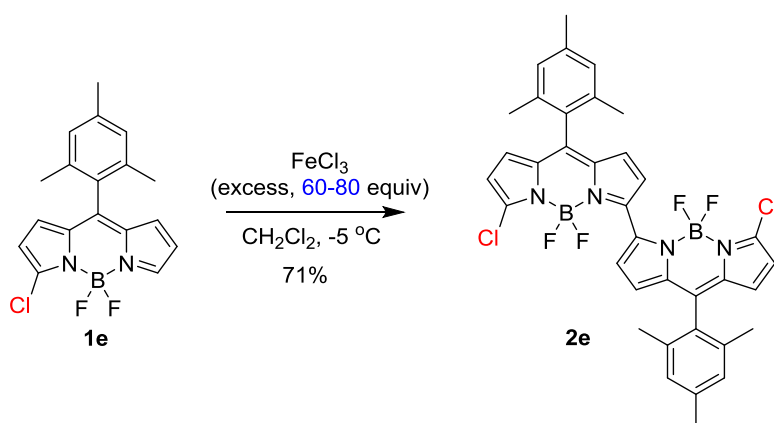

Syntheses of BODIPY **2e**: A solution of BODIPY **1e** (52 mg, 0.15 mmol) was dissolved in fresh and dried  $CH_2Cl_2$  (10 mL) and stirred at  $-5\text{ }^\circ C$ , then the excess  $FeCl_3$  (1.46-1.94 g, 9-12 mmol) was added into the mixture and continued to stir at  $-5\text{ }^\circ C$  for 25-30 min, and was quenched by adding saturated aqueous solution of  $NaHCO_3$ . The reaction mixture was diluted with dichloromethane, washed twice with water, dried over anhydrous  $Na_2SO_4$ , and evaporated under vacuum. The residue

was purified by column chromatography on silica gel with CH<sub>2</sub>Cl<sub>2</sub>/petroleum ether (1/2, v/v) as eluent to give the desired **2e** in 71% isolated yield (37 mg). <sup>1</sup>H NMR (500 MHz, CDCl<sub>3</sub>) δ 7.54 (d, *J* = 4.5 Hz, 2H), 6.97 (s, 4H), 6.70 (d, *J* = 4.5 Hz, 2H), 6.63 (d, *J* = 4.0 Hz, 2H), 6.37 (d, *J* = 4.5 Hz, 2H), 2.37 (s, 6H), 2.15 (s, 12H). <sup>13</sup>C NMR (125 MHz, CDCl<sub>3</sub>) δ 148.2, 144.8, 144.4, 139.1, 137.9, 136.67, 134.8, 129.9, 129.7, 129.1, 128.2, 124.6, 119.3, 21.1, 20.1. HRMS (APCI) *m/z*: Calcd for C<sub>36</sub>H<sub>30</sub>B<sub>2</sub>Cl<sub>2</sub>F<sub>3</sub>N<sub>4</sub><sup>+</sup> [M-F]<sup>+</sup> 667.1986, Found 667.2034.

### Syntheses of dimer **2f**.

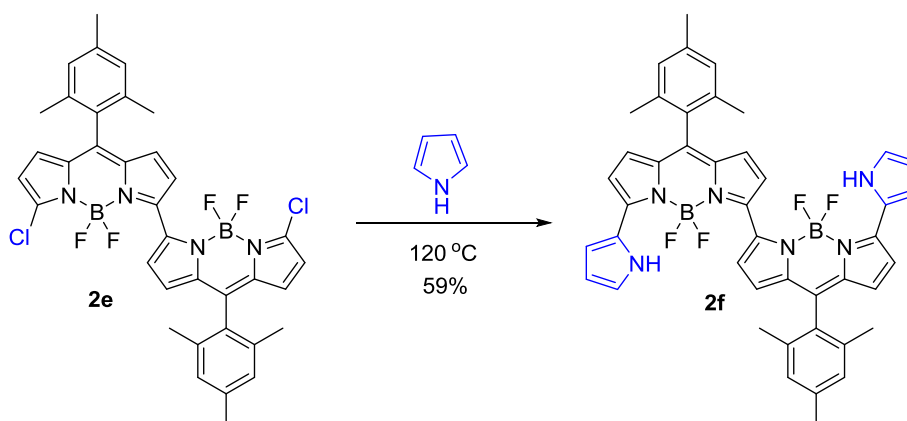

Syntheses of BODIPY **2f**: BODIPY **2e** (137 mg, 0.2 mmol) was dissolved in pyrrole (2.0 mL) and stirred under argon at 120 °C for 12 hours. After cooling down to room temperature, the excess pyrrole was removed under reduced pressure. The residue was purified through column chromatography on silica using CH<sub>2</sub>Cl<sub>2</sub>/petroleum (1:2, v/v) as eluent, from which the desired product **2f** was obtained in 59% yield (88 mg). <sup>1</sup>H NMR (400 MHz, CDCl<sub>3</sub>) δ 10.51 (brs, 2H), 7.34 (d, *J* = 4.0 Hz, 2H), 7.13 (s, 2H), 6.98 (s, 6H), 6.85 (d, *J* = 4.4 Hz, 2H), 6.64 (d, *J* = 4.8 Hz, 2H), 6.49 (d, *J* = 4.4 Hz, 2H), 6.34 (s, 2H), 2.38 (s, 6H), 2.20 (s, 12H). <sup>13</sup>C NMR (100 MHz, CDCl<sub>3</sub>) δ 150.8, 143.8, 138.3, 138.0, 137.3, 137.1, 136.3, 130.6, 130.4, 128.1, 126.1, 124.5, 123.9, 122.5, 121.4, 118.1, 111.4, 21.2, 20.3. HRMS (ESI) *m/z* calcd for C<sub>44</sub>H<sub>39</sub>B<sub>2</sub>F<sub>4</sub>N<sub>6</sub><sup>+</sup> [M+H]<sup>+</sup> 749.3353, found 749.3356.

## Synthesis of dimer **2g**.

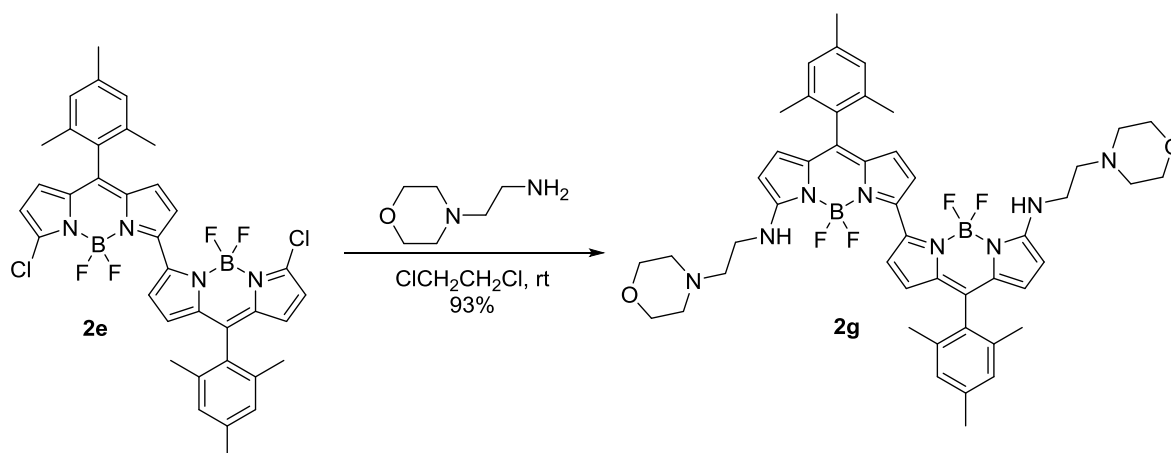

**Syntheses of **2g**:** In a 10 mL flask, a solution of **2e** (69 mg, 0.1 mmol) was dissolved in 1,2-dichloroethane (3.0 mL) and 4-(2-aminoethyl)morpholine (78  $\mu$ L, 0.6 mmol) was added to the mixture and stirred at room temperature for 2.5 hours. The solvent was concentrated under reduced pressure and the residue was purified by silica-gel column chromatography (eluent: ethyl acetate/n-hexane = 1/3). Recrystallization from CH<sub>2</sub>Cl<sub>2</sub>/ petroleum afforded pure dye **2g** as dark green powder (81 mg, 93%). <sup>1</sup>H NMR (400 MHz, CDCl<sub>3</sub>)  $\delta$  7.16 (d,  $J$  = 4.0 Hz, 2H), 6.93 (s, 4H), 6.78 (s, 2H), 6.60 (d,  $J$  = 4.8 Hz, 2H), 6.24 (d,  $J$  = 4.0 Hz, 2H), 6.04 (d,  $J$  = 4.8 Hz, 2H), 3.71 – 3.67 (m, 8H), 3.41 (d,  $J$  = 5.6 Hz, 4H), 2.61 (t,  $J$  = 6.2 Hz, 4H), 2.49 (s, 8H), 2.35 (s, 6H), 2.16 (s, 12H). <sup>13</sup>C NMR (100 MHz, CDCl<sub>3</sub>)  $\delta$  160.8, 139.9, 137.7, 137.5, 134.6, 133.2, 131.2, 130.7, 127.9, 120.4, 118.7, 109.4, 66.8, 57.0, 53.3, 41.1, 21.1, 20.1. HRMS (ESI)  $m/z$  calcd for C<sub>48</sub>H<sub>57</sub>B<sub>2</sub>F<sub>4</sub>N<sub>8</sub>O<sub>2</sub><sup>+</sup> [M+H]<sup>+</sup> 875.4721, found 875.4727.

### 3. Crystal data

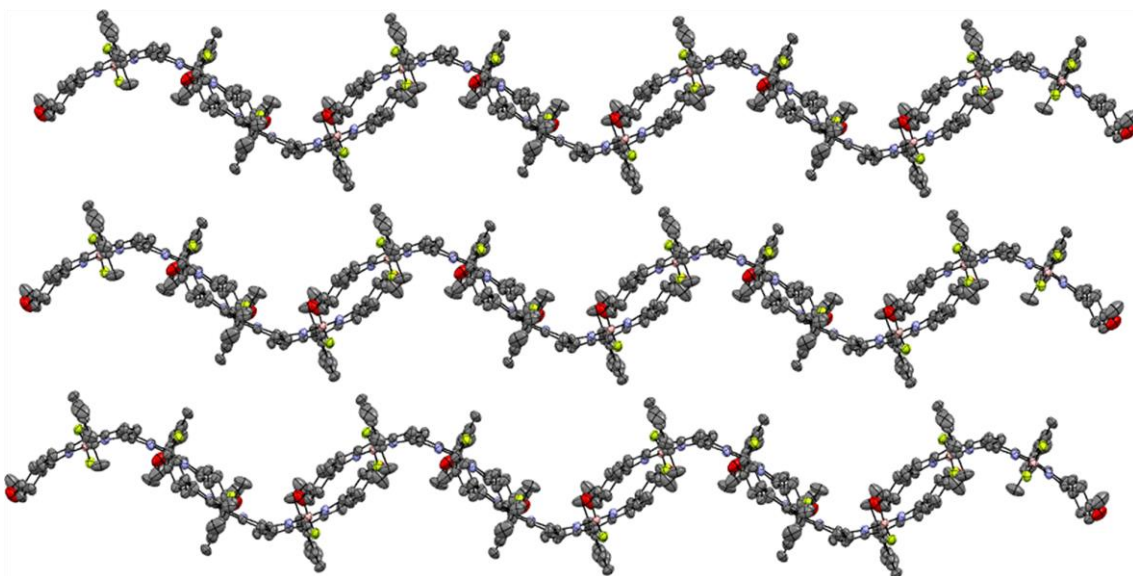

**Figure S1.** The packing of dimer **2c**: C, gray; N, purple; B, pink; F, yellow; O, red. Hydrogen atoms were removed for clarity. Thermal ellipsoids are shown at the 50% probability level.

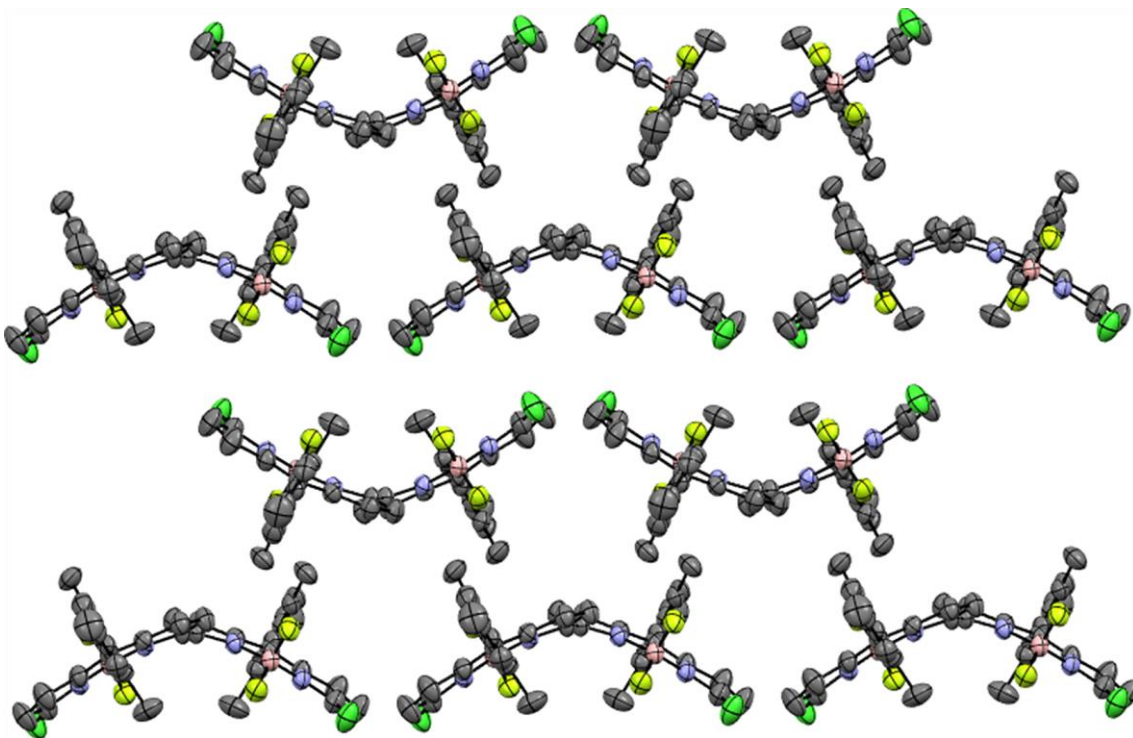

**Figure S2.** The packing of dimer **2e**: C, gray; N, purple; B, pink; F, yellow; Cl, green. Hydrogen atoms were removed for clarity. Thermal ellipsoids are shown at the 50% probability level.



**Table S1.** Selected geometrical parameters of compound **2c** and **2e** obtained from crystallography

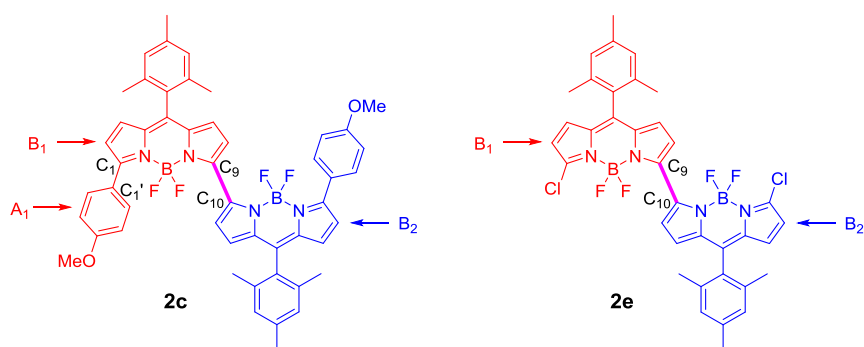

|                                                                                         | <b>2c</b>        | <b>2e</b>        |
|-----------------------------------------------------------------------------------------|------------------|------------------|
| the C <sub>1</sub> -C <sub>1'</sub> bond length (Å)                                     | 1.46(4)          | /                |
| the C <sub>9</sub> -C <sub>10</sub> bond length (Å)                                     | 1.4(5)           | 1.45(8)          |
| the C-O bond length (Å)                                                                 | 1.36(6)          | /                |
| the C-Cl bond length (Å)                                                                | /                | 1.69(8), 1.69(8) |
| the B-N bond length (Å)                                                                 | 1.58(5), 1.56(9) | 1.56(9), 1.56(2) |
| the B-F bond length (Å)                                                                 | 1.39(1), 1.37(4) | 1.37(9), 1.36(9) |
| dihedral angles between <i>meso</i> -aryl and dipyrin core in B <sub>1</sub> (deg)      | 89.53            | 89.00            |
| dihedral angles between <i>meso</i> -aryl and dipyrin core in B <sub>2</sub> (deg)      | 89.53            | 89.00            |
| dihedral angles of two dipyrin cores in B <sub>1</sub> and B <sub>2</sub> (deg)         | 52.67            | 57.21            |
| dihedral angles between $\alpha$ -benzene ring and dipyrin core in B <sub>1</sub> (deg) | 43.00            | /                |

**Table S2.** Crystal data and structure refinement for **2c** and **2e**.

| Crystal data                                  | <b>2c</b>                                                                                   | <b>2e</b>                                                                                    |
|-----------------------------------------------|---------------------------------------------------------------------------------------------|----------------------------------------------------------------------------------------------|
| CCDC number                                   | 2053912                                                                                     | 2095140                                                                                      |
| Empirical formula                             | C <sub>50</sub> H <sub>44</sub> B <sub>2</sub> F <sub>4</sub> N <sub>4</sub> O <sub>2</sub> | C <sub>36</sub> H <sub>30</sub> B <sub>2</sub> Cl <sub>2</sub> F <sub>4</sub> N <sub>4</sub> |
| Formula weight                                | 830.51                                                                                      | 687.16                                                                                       |
| Temperature/K                                 | 298                                                                                         | 298                                                                                          |
| Crystal system                                | orthorhombic                                                                                | orthorhombic                                                                                 |
| Space group                                   | Pbcn                                                                                        | Pbcn                                                                                         |
| <i>a</i> (Å)                                  | 15.4942(8)                                                                                  | 15.1048(5)                                                                                   |
| <i>b</i> (Å)                                  | 12.4379(8)                                                                                  | 12.2629(4)                                                                                   |
| <i>c</i> (Å)                                  | 25.9022(17)                                                                                 | 18.3629(6)                                                                                   |
| $\alpha$ (°)                                  | 90                                                                                          | 90                                                                                           |
| $\beta$ (°)                                   | 90                                                                                          | 90                                                                                           |
| $\gamma$ (°)                                  | 90                                                                                          | 90                                                                                           |
| Volume (Å <sup>3</sup> )                      | 4991.8(5)                                                                                   | 3401.34(2)                                                                                   |
| <i>Z</i>                                      | 4                                                                                           | 4                                                                                            |
| $\rho_{\text{calc}}$ g/cm <sup>3</sup>        | 1.105                                                                                       | 1.342                                                                                        |
| $\mu$ (mm <sup>-1</sup> )                     | 0.077                                                                                       | 0.245                                                                                        |
| F(000)                                        | 1736.0                                                                                      | 1416.0                                                                                       |
| Crystal size (mm <sup>3</sup> )               | 0.21 × 0.22 × 0.19                                                                          | 0.18 × 0.20 × 0.21                                                                           |
| Radiation                                     | MoK $\alpha$ , ( $\lambda$ = 0.71073)                                                       | MoK $\alpha$ , ( $\lambda$ = 0.71073)                                                        |
| $2\theta$ range for data collection/°         | 3.144 to 55.096                                                                             | 6.164 to 55.07                                                                               |
| Index ranges                                  | -17 ≤ <i>h</i> ≤ 19, -16 ≤ <i>k</i> ≤ 16,<br>-33 ≤ <i>l</i> ≤ 33                            | -19 ≤ <i>h</i> ≤ 18, -15 ≤ <i>k</i> ≤ 15,<br>-23 ≤ <i>l</i> ≤ 23                             |
| Reflections collected                         | 131551                                                                                      | 39671                                                                                        |
| Independent reflections                       | 5589 [R <sub>int</sub> = 0.1002, R <sub>sigma</sub> =<br>0.0271]                            | 3874 [R <sub>int</sub> = 0.1094, R <sub>sigma</sub> =<br>0.0394]                             |
| Data/restraints/parameters                    | 5589/0/284                                                                                  | 3874/0/220                                                                                   |
| Goodness-of-fit on F <sup>2</sup>             | 1.103                                                                                       | 1.110                                                                                        |
| Final R indexes [ <i>I</i> ≥ 2σ ( <i>I</i> )] | R <sub>1</sub> = 0.0846<br>wR <sub>2</sub> = 0.2539                                         | R <sub>1</sub> = 0.0713<br>wR <sub>2</sub> = 0.1365                                          |
| Final R indexes [all data]                    | R <sub>1</sub> = 0.1135<br>wR <sub>2</sub> = 0.2974                                         | R <sub>1</sub> = 0.0892<br>wR <sub>2</sub> = 0.1492                                          |
| Largest diff. peak/hole / e Å <sup>-3</sup>   | 0.60/-0.49                                                                                  | 0.32/-0.35                                                                                   |

## 4. Photophysical properties

**Table S3.** Spectroscopic and photophysical properties of BODIPYs in different solvents.

| dyes      | solvent                         | $\lambda_{\text{abs}}^{\text{max}}$ (nm) | $\epsilon^{\text{a}}$ | $\lambda_{\text{em}}^{\text{max}}$ (nm) | $\Phi^{\text{b}}$ | Stokes shift ( $\text{cm}^{-1}$ ) |
|-----------|---------------------------------|------------------------------------------|-----------------------|-----------------------------------------|-------------------|-----------------------------------|
| <b>1a</b> | Toluene                         | 531                                      | 62000                 | 552                                     | 0.85              | 720                               |
|           | CH <sub>2</sub> Cl <sub>2</sub> | 527                                      | 66300                 | 549                                     | 0.87              | 760                               |
| <b>2a</b> | Cyclohexane                     | 723                                      | 56600                 | 752                                     | 0.30              | 530                               |
|           | Toluene                         | 718                                      | 57100                 | 776                                     | 0.33              | 1040                              |
|           | THF                             | 717                                      | 59700                 | 773                                     | 0.30              | 1010                              |
|           | CHCl <sub>3</sub>               | 717                                      | 51400                 | 768                                     | 0.37              | 930                               |
|           | CH <sub>3</sub> CN              | 693                                      | 49100                 | 772                                     | 0.31              | 1480                              |
|           |                                 |                                          |                       |                                         |                   |                                   |
| <b>2b</b> | Cyclohexane                     | 735                                      | 59500                 | 789                                     | 0.13              | 930                               |
|           | Toluene                         | 726                                      | 60000                 | 784                                     | 0.21              | 1020                              |
|           | THF                             | 729                                      | 64600                 | 780                                     | 0.15              | 900                               |
|           | CHCl <sub>3</sub>               | 726                                      | 51200                 | 789                                     | 0.16              | 1100                              |
|           | CH <sub>3</sub> CN              | 699                                      | 53300                 | 767                                     | 0.13              | 1270                              |
| <b>2c</b> | Cyclohexane                     | 739                                      | 58400                 | 797                                     | 0.21              | 990                               |
|           | Toluene                         | 736                                      | 57300                 | 799                                     | 0.19              | 1070                              |
|           | THF                             | 738                                      | 62800                 | 797                                     | 0.14              | 1000                              |
|           | CHCl <sub>3</sub>               | 736                                      | 46600                 | 797                                     | 0.19              | 1040                              |
|           | CH <sub>3</sub> CN              | 715                                      | 50300                 | 782                                     | 0.15              | 1200                              |
| <b>2d</b> | Cyclohexane                     | 726                                      | 46500                 | 777                                     | 0.23              | 900                               |
|           | Toluene                         | 723                                      | 47100                 | 777                                     | 0.25              | 960                               |
|           | THF                             | 722                                      | 49800                 | 778                                     | 0.25              | 1000                              |
|           | CHCl <sub>3</sub>               | 719                                      | 40200                 | 780                                     | 0.24              | 1090                              |
|           | CH <sub>3</sub> CN              | 698                                      | 41000                 | 785                                     | 0.20              | 1590                              |
| <b>2e</b> | Cyclohexane                     | 687                                      | 78900                 | 729                                     | 0.45              | 840                               |
|           | Toluene                         | 688                                      | 74900                 | 732                                     | 0.51              | 870                               |
|           | THF                             | 680                                      | 76700                 | 725                                     | 0.42              | 910                               |
|           | CHCl <sub>3</sub>               | 685                                      | 68300                 | 729                                     | 0.54              | 880                               |
|           | CH <sub>3</sub> CN              | 663                                      | 63600                 | 713                                     | 0.30              | 1060                              |
| <b>2f</b> | Cyclohexane                     | 796                                      | 58700                 | 834                                     | 0.02              | 570                               |
|           | Toluene                         | 773                                      | 55000                 | 827                                     | 0.03              | 850                               |
|           | THF                             | 785                                      | 70600                 | 829                                     | 0.01              | 680                               |
|           | CHCl <sub>3</sub>               | 784                                      | 51800                 | 829                                     | 0.02              | 700                               |
|           | CH <sub>3</sub> CN              | 760                                      | 55800                 | 821                                     | 0.02              | 980                               |

|           |                    |     |       |     |      |      |
|-----------|--------------------|-----|-------|-----|------|------|
| <b>2g</b> | Cyclohexane        | 667 | 51900 | 740 | 0.17 | 1480 |
|           | Toluene            | 673 | 51200 | 736 | 0.21 | 1270 |
|           | THF                | 649 | 52300 | 724 | 0.18 | 1600 |
|           | CHCl <sub>3</sub>  | 656 | 45500 | 734 | 0.20 | 1620 |
|           | CH <sub>3</sub> CN | 615 | 46800 | 710 | 0.17 | 2180 |

<sup>a</sup>Data corresponding to the strongest absorption maximum, the unit for  $\epsilon$  is  $M^{-1} cm^{-1}$ .

<sup>b</sup>Fluorescence quantum yields of **2a-e** and **2g** were calculated using 1,7-diphenyl-3,5-di(4-methoxyphenyl)-azadipyrromethene ( $\Phi = 0.36$  in chloroform) as the reference. Fluorescence quantum yields of **2f** was calculated using Indocyanine Green ( $\Phi = 0.12$  in DMSO) as the reference. The standard errors are less than 5% from three independent measurements.

### Absorption and emission spectra of BODIPY 1a and all BODIPY dimers at different solvents

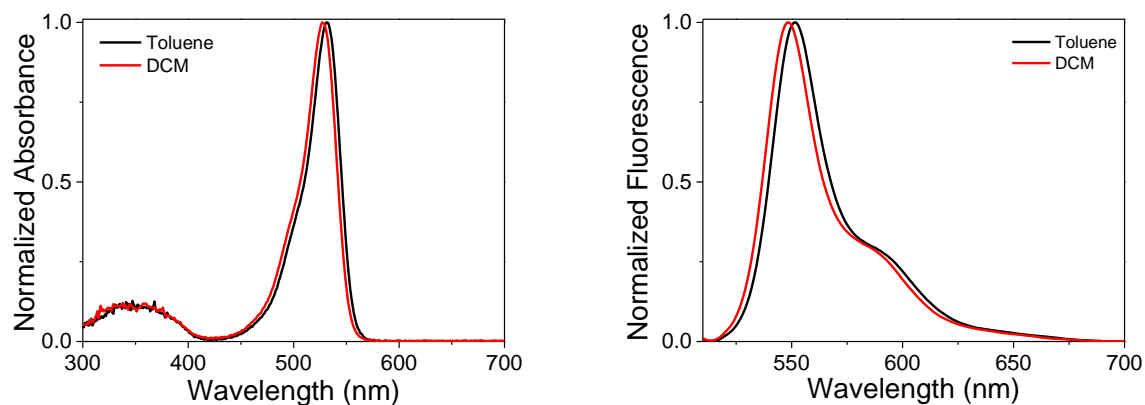

**Figure S3.** Absorption (left) and emission (right) spectra of compound **1a** recorded in different solvents. Excited at 500 nm.

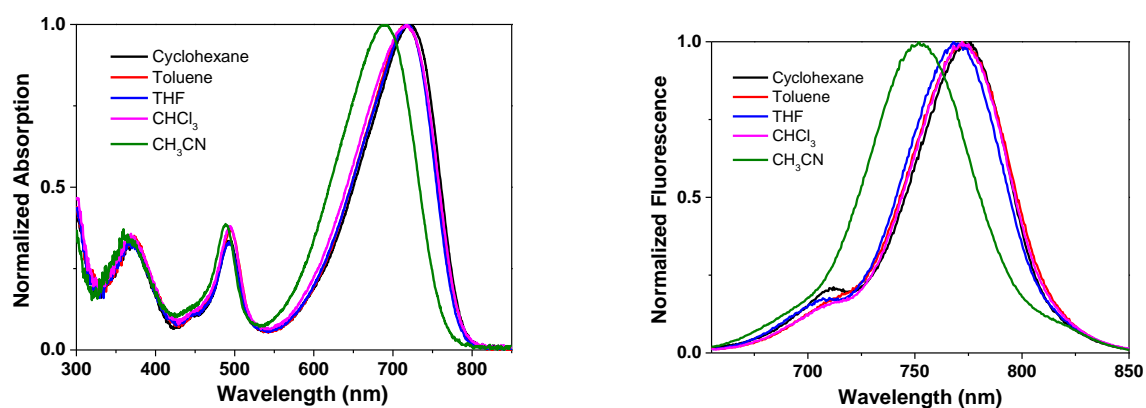

**Figure S4.** Absorption (left) and emission (right) spectra of compound **2a** recorded in different solvents. Excited at 655 nm.

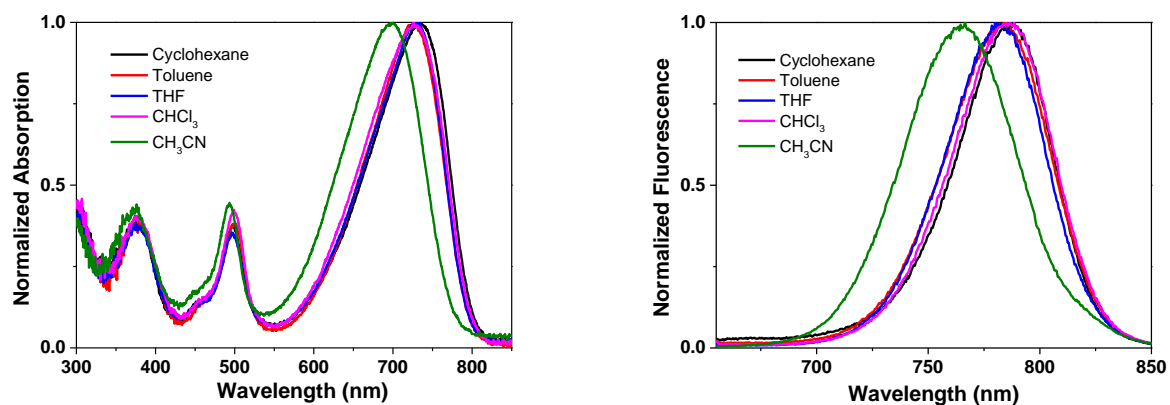

**Figure S5.** Absorption (left) and emission (right) spectra of compound **2b** recorded in different solvents. Excited at 655 nm.

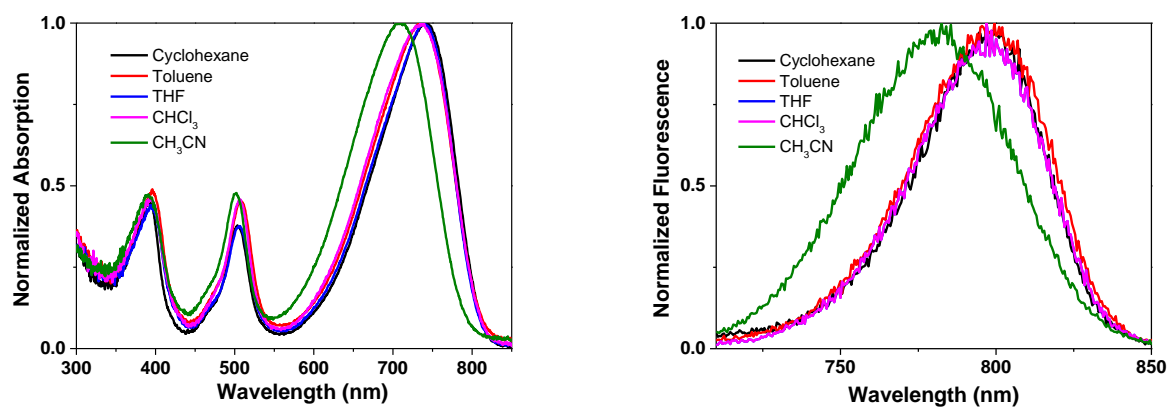

**Figure S6.** Absorption (left) and emission (right) spectra of compound **2c** recorded in different solvents. Excited at 655 nm.

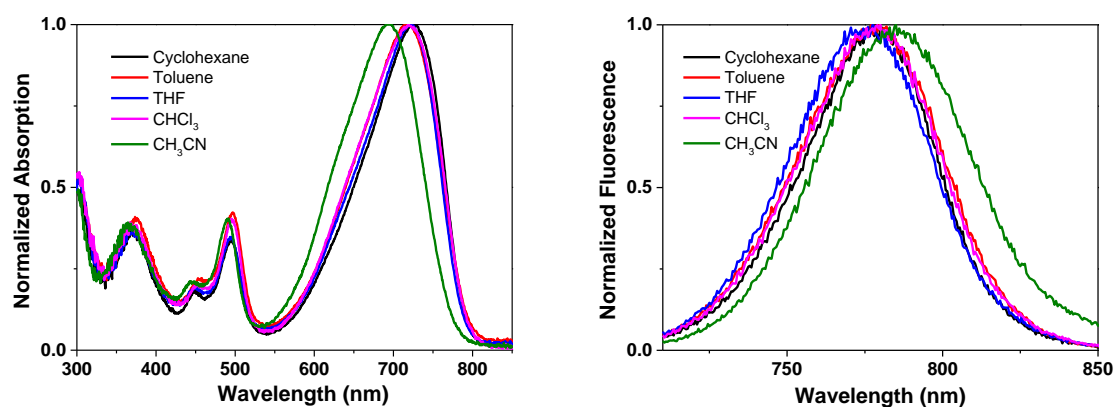

**Figure S7.** Absorption (left) and emission (right) spectra of compound **2d** recorded in different solvents. Excited at 655 nm.

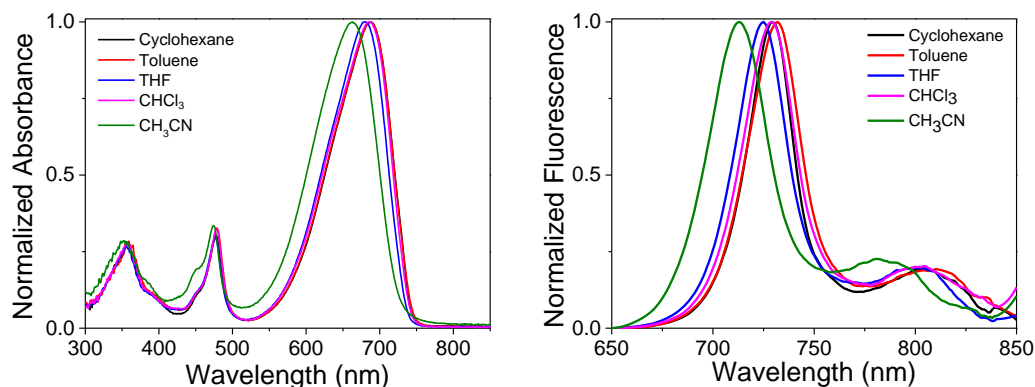

**Figure S8.** Absorption (left) and emission (right) spectra of compound **2e** recorded in different solvents. Excited at 640 nm.

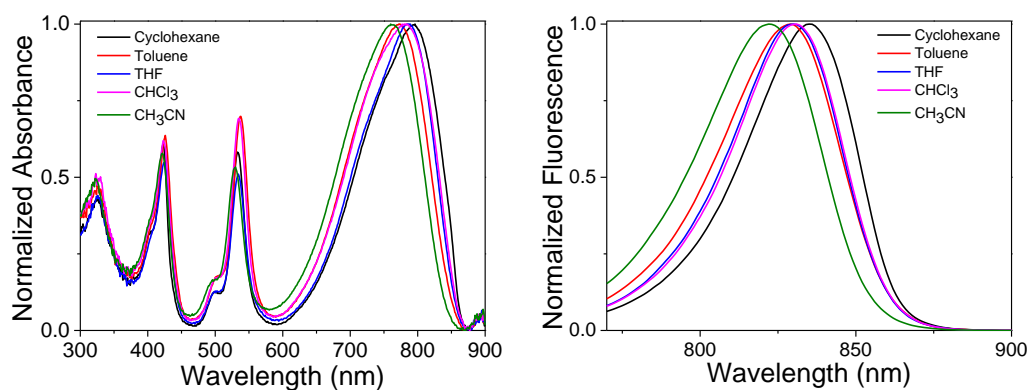

**Figure S9.** Absorption (left) and emission (right) spectra of compound **2f** recorded in different solvents, excited at 760 nm.

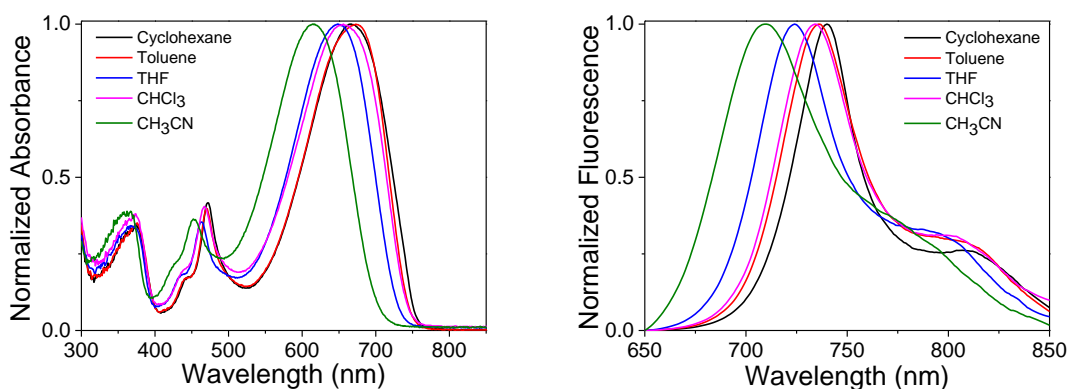

**Figure S10.** Absorption (left) and emission (right) spectra of compound **2g** recorded in different solvents. Excited at 640 nm.

## 5. Electrochemical spectra

**Table S4. Electrochemical data acquired at 100 mV/s, and HOMO-LUMO Gaps determined from spectroscopy of dyes M, 1a and 2a<sup>a</sup>**

| dyes      | $E_{1/2}^{\text{red}}$<br>(V) | $E_{\text{red}}^{\text{onset}}$<br>(V) | $E_{\text{p}}^{\text{ox}}$<br>(V) | $E_{\text{ox}}^{\text{onset}}$<br>(V) | LUMO<br>(eV) | HOMO<br>(eV) | $E_{\text{g}}^{\text{e}}$<br>(eV) | $E_{\text{g}}^{\text{o}}$<br>(eV) |
|-----------|-------------------------------|----------------------------------------|-----------------------------------|---------------------------------------|--------------|--------------|-----------------------------------|-----------------------------------|
| <b>M</b>  | -0.93                         | -0.86                                  | 1.71                              | 1.46                                  | -3.94        | -6.26        | 2.32                              | 2.38                              |
| <b>1a</b> | -0.93                         | -0.74                                  | 1.51                              | 1.31                                  | -4.06        | -6.11        | 2.05                              | 2.23                              |
| <b>2a</b> | -0.59;<br>-1.08               | -0.51                                  | 1.09                              | 1.05                                  | -4.29        | -5.85        | 1.56                              | 1.55                              |

<sup>a</sup> $E_{1/2}^{\text{red}}$  = reversible reduction peak potentials;  $E_{\text{p}}^{\text{ox}}$  = oxidation peak potentials;  $E_{\text{red}}^{\text{onset}}$  = the onset reduction potentials;  $E_{\text{ox}}^{\text{onset}}$  = the onset oxidation potentials;  $E_{\text{LUMO}} = -e(E_{\text{red}}^{\text{onset}} + 4.8)$ ;  $E_{\text{HOMO}} = -e(E_{\text{ox}}^{\text{onset}} + 4.8)$ ;  $E_{\text{g}}^{\text{e}}$  = bandgap, obtained from the intercept of the electrochemical data;  $E_{\text{g}}^{\text{e}} = E_{\text{LUMO}} - E_{\text{HOMO}}$ ;  $E_{\text{g}}^{\text{o}}$  = bandgap, obtained from the intercept of the absorption spectra.

## 6. DFT calculation

The ground state geometry was optimized by using DFT method at B3LYP/6-31G(d, p) level. The same method was used for vibrational analysis to verify that the optimized structures correspond to local minima on the energy surface. TD-DFT computations were used the optimized ground state geometries under the B3LYP/6-31G (d, p) theoretical level. The calculated molecules in dichloromethane were done using the Self-Consistent Reaction Field (SCRF) method and Polarizable Continuum Model (PCM). All of the calculations were carried out by the methods implemented in Gaussian 09 package<sup>10</sup>.

The Mulliken spin density calculations and the natural population analysis were performed at the B3LYP/6-311G(d, p) level on the basis of the optimized structures.<sup>11</sup> The natural population analysis values cation radical **M** and **1a** are presented in Figure S11.

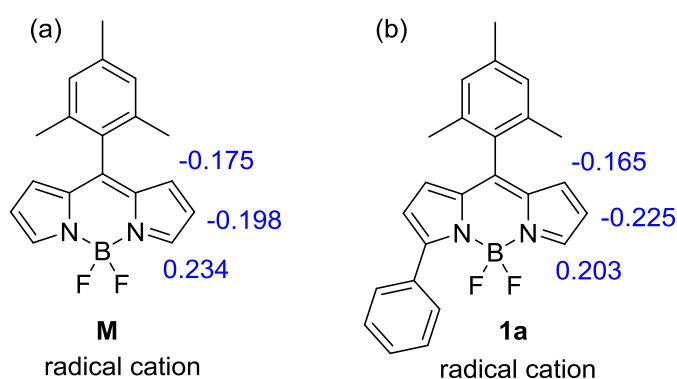

**Figure S11.** The natural population analysis values (charge density distributions) for cation radicals of **M** and **1a**.



**Table S5.** Selected electronic excitation energies (eV) and oscillator strengths ( $f$ ), configurations of the low-lying excited states of **M**, **1a** and **2a** calculated by TDDFT//B3LYP/6-31+G(d,p), based on the optimized ground state geometries.

|    | Electronic transition | TD//B3LYP/6-31G(d, p)     |                    |                            |                   |
|----|-----------------------|---------------------------|--------------------|----------------------------|-------------------|
|    |                       | Energy/ eV <sup>[a]</sup> | $f$ <sup>[b]</sup> | Composition <sup>[c]</sup> | CI <sup>[d]</sup> |
| M  | S0→S1                 | 2.9248 eV 423.90 nm       | 0.0000             | HOMO → LUMO +1             | 0.7050            |
|    | S0→S2                 | 3.0107 eV 411.81 nm       | 0.4328             | HOMO → LUMO                | 0.6710            |
|    |                       |                           |                    | HOMO ← LUMO                | 0.1013            |
|    | S0→S3                 | 3.0719 eV 403.61 nm       | 0.0206             | HOMO → LUMO                | 0.1300            |
|    |                       |                           |                    | HOMO -2 → LUMO             | 0.6935            |
| 1a | S0→S1                 | 2.7165 eV 456.41 nm       | 0.6870             | HOMO → LUMO                | 0.7023            |
|    | S0→S2                 | 2.9416 eV 421.49 nm       | 0.0017             | HOMO -1 → LUMO             | 0.7046            |
|    | S0→S3                 | 3.0824 eV 402.24 nm       | 0.0007             | HOMO -2 → LUMO             | 0.7064            |
| 2a | S0→S1                 | 1.8995 eV 652.72 nm       | 1.0060             | HOMO → LUMO                | 0.7078            |
|    | S0→S2                 | 2.4164 eV 513.09 nm       | 0.0001             | HOMO -1 → LUMO             | 0.4812            |
|    |                       |                           |                    | HOMO → LUMO +1             | 0.5154            |
|    | S0→S3                 | 2.7480 eV 451.19 nm       | 0.0005             | HOMO -2 → LUMO             | 0.6765            |
|    |                       |                           |                    | HOMO -3 → LUMO +1          | 0.1943            |

[a] Only the selected low-lying excited states are presented. [b] Oscillator strength. [c] Only the main configurations are presented. [d] The CI coefficients are in absolute values.

## Optimized Geometries of the Compounds

**M**, optimized S<sub>0</sub> state Geometry.

|   |              |             |            |
|---|--------------|-------------|------------|
| B | -14.90043263 | 9.54503278  | 8.96819373 |
| C | -12.38363263 | 8.78123278  | 9.38569373 |
| C | -11.31223263 | 8.37723278  | 8.57089373 |
| C | -11.76183263 | 8.36403278  | 7.27739373 |
| C | -13.09453263 | 8.79003278  | 7.28749373 |
| C | -13.93833263 | 9.01853278  | 6.19809373 |
| C | -15.20683263 | 9.53733278  | 6.38869373 |
| C | -16.24083263 | 9.85193278  | 5.48189373 |
| C | -17.30593263 | 10.29893278 | 6.22349373 |
| C | -16.91523263 | 10.24823278 | 7.57609373 |
| C | -13.47733263 | 8.65543278  | 4.82039373 |
| C | -13.83513263 | 7.40703278  | 4.29449373 |
| C | -13.35433263 | 7.06923278  | 3.02979373 |
| C | -12.55663263 | 7.92143278  | 2.29739373 |
| C | -12.27263263 | 9.16753278  | 2.81599373 |
| C | -12.69673263 | 9.55503278  | 4.08979373 |
| C | -14.67243263 | 6.41583278  | 5.05579373 |
| C | -11.96703263 | 7.46663278  | 0.97959373 |
| C | -12.27323263 | 10.88513278 | 4.64939373 |
| F | -15.60783263 | 8.51413278  | 9.61579373 |
| F | -14.89513263 | 10.58043278 | 9.75829373 |
| N | -13.47153263 | 9.03623278  | 8.60639373 |
| N | -15.66123263 | 9.81113278  | 7.67209373 |

|   |              |             |             |
|---|--------------|-------------|-------------|
| H | -10.45473263 | 8.15983278  | 8.85749373  |
| H | -11.27003263 | 8.11453278  | 6.52829373  |
| H | -16.20733263 | 9.77243278  | 4.55689373  |
| H | -18.12843263 | 10.58153278 | 5.89589373  |
| H | -17.45433263 | 10.48443278 | 8.29639373  |
| H | -13.57893263 | 6.24253278  | 2.66889373  |
| H | -11.78383263 | 9.76913278  | 2.30189373  |
| H | -14.92673263 | 5.69723278  | 4.47199373  |
| H | -15.46033263 | 6.85183278  | 5.38789373  |
| H | -14.16503263 | 6.06593278  | 5.79129373  |
| H | -12.01633263 | 8.18193278  | 0.34269373  |
| H | -12.46093263 | 6.71163278  | 0.65199373  |
| H | -11.04943263 | 7.21603278  | 1.10849373  |
| H | -13.01703263 | 11.29683278 | 5.09369373  |
| H | -11.97423263 | 11.45133278 | 3.93359373  |
| H | -11.55763263 | 10.75593278 | 5.27569373  |
| H | -12.35014323 | 8.87400022  | 10.45113855 |

SCF done: -1030.41688463 Hartree

No imaginary Frequency.

### 1a, optimized S<sub>0</sub> state Geometry.

|   |             |             |             |
|---|-------------|-------------|-------------|
| B | -1.63866900 | 1.52017400  | -0.12607000 |
| C | -0.14387100 | 3.59890200  | 0.23405800  |
| C | 1.24610500  | 3.95841800  | 0.27631300  |
| C | 1.95865400  | 2.79366400  | 0.16240100  |
| C | 0.99975000  | 1.72292000  | 0.06296000  |
| C | 1.18156400  | 0.34812700  | -0.01151800 |
| C | 0.03624900  | -0.49206500 | -0.02638300 |
| C | 0.02085500  | -1.92288800 | 0.08686100  |
| C | -1.28664100 | -2.29782800 | 0.16238500  |
| C | -2.10131200 | -1.09968600 | 0.04965800  |
| C | 2.54907900  | -0.25061000 | -0.02745500 |
| C | 3.25885600  | -0.41503600 | 1.18300700  |
| C | 4.53262800  | -0.98747900 | 1.13040200  |
| C | 5.12150000  | -1.38603200 | -0.07412200 |
| C | 4.39181800  | -1.21020300 | -1.25454100 |
| C | 3.11162300  | -0.65108200 | -1.26023600 |
| C | 2.67205600  | -0.01029100 | 2.51840100  |
| C | 6.51356100  | -1.96817500 | -0.10151200 |
| C | 2.37195400  | -0.47149500 | -2.56802100 |
| F | -2.52558000 | 1.84546800  | 0.86412100  |
| F | -2.09116300 | 1.84066600  | -1.39173500 |
| N | -0.28165700 | 2.28378700  | 0.10845000  |
| N | -1.26768200 | -0.02243200 | -0.06068100 |
| H | 1.62644400  | 4.96521900  | 0.37873200  |
| H | 3.03146800  | 2.66136700  | 0.15532300  |
| H | 0.90214700  | -2.54747600 | 0.11616200  |
| H | -1.67382600 | -3.30359400 | 0.23530800  |
| H | 5.07848000  | -1.12911400 | 2.06015900  |
| H | 4.83077300  | -1.51651800 | -2.20104800 |
| H | 3.31929700  | -0.33483800 | 3.33708400  |
| H | 1.68211100  | -0.45163600 | 2.68577800  |
| H | 2.55663700  | 1.07707800  | 2.60616000  |
| H | 6.64227300  | -2.66247700 | -0.93755100 |
| H | 6.74387000  | -2.50156400 | 0.82589600  |
| H | 7.26457000  | -1.17595200 | -0.21708800 |
| H | 1.43660700  | -1.04438700 | -2.59668900 |

|   |             |             |             |
|---|-------------|-------------|-------------|
| H | 2.98537900  | -0.80690700 | -3.40801800 |
| H | 2.10993200  | 0.57807500  | -2.74945900 |
| H | -1.01026800 | 4.24701100  | 0.28302100  |
| C | -3.54039900 | -1.10044000 | 0.02949400  |
| C | -4.31394500 | -0.08661700 | -0.59663500 |
| C | -4.21576400 | -2.19438700 | 0.64160400  |
| C | -5.69695600 | -0.16673600 | -0.59206600 |
| H | -3.82382300 | 0.72339600  | -1.11847900 |
| C | -5.59830700 | -2.24950900 | 0.65909300  |
| H | -3.64727100 | -2.97047700 | 1.14180600  |
| C | -6.34484300 | -1.23696100 | 0.03955600  |
| H | -6.27929100 | 0.60292200  | -1.08832600 |
| H | -6.10169300 | -3.07557300 | 1.15089700  |
| H | -7.42970300 | -1.28717100 | 0.04261000  |

SCF done: -1261.48392383 Hartree

No imaginary Frequency.

### 2a, optimized S<sub>0</sub> state Geometry.

|   |             |             |             |
|---|-------------|-------------|-------------|
| B | 1.98130200  | -1.84158100 | 0.18692000  |
| C | 0.66094800  | 0.30354700  | 1.00823900  |
| C | 0.99315900  | 1.61721900  | 1.43215000  |
| C | 2.36664100  | 1.74017200  | 1.36072700  |
| C | 2.87226900  | 0.51013300  | 0.87187400  |
| C | 4.18615200  | 0.17417200  | 0.50702100  |
| C | 4.45011100  | -1.05105700 | -0.11052000 |
| C | 5.65772800  | -1.52150000 | -0.68846200 |
| C | 5.37281200  | -2.73080500 | -1.28794500 |
| C | 3.99759600  | -3.01650800 | -1.05862200 |
| C | 5.29437300  | 1.15518800  | 0.73212400  |
| C | 6.01271100  | 1.12418400  | 1.94656900  |
| C | 7.04346600  | 2.04865500  | 2.14119600  |
| C | 7.37835300  | 2.99975100  | 1.17208400  |
| C | 6.65347100  | 3.00524500  | -0.02292200 |
| C | 5.61329900  | 2.10088400  | -0.26483200 |
| C | 5.69054600  | 0.11500500  | 3.02543200  |
| C | 8.47553800  | 4.00703500  | 1.42171700  |
| C | 4.86195000  | 2.15169400  | -1.57607600 |
| F | 1.82000400  | -2.69865500 | 1.29402600  |
| F | 1.06793000  | -2.13062600 | -0.81001300 |
| N | 1.80784100  | -0.36299600 | 0.67527200  |
| N | 3.44711100  | -1.99516200 | -0.34690000 |
| B | -1.98130100 | 1.84157900  | 0.18692300  |
| C | -0.66095100 | -0.30355000 | 1.00824200  |
| C | -0.99316400 | -1.61721700 | 1.43216500  |
| C | -2.36664600 | -1.74017000 | 1.36073900  |
| C | -2.87227200 | -0.51013300 | 0.87187900  |
| C | -4.18615400 | -0.17417100 | 0.50702100  |
| C | -4.45011000 | 1.05105600  | -0.11052300 |
| C | -5.65772500 | 1.52149900  | -0.68846900 |
| C | -5.37280600 | 2.73080400  | -1.28795200 |
| C | -3.99759000 | 3.01650400  | -1.05862900 |
| C | -5.29437800 | -1.15518500 | 0.73212500  |
| C | -6.01272200 | -1.12417200 | 1.94656400  |
| C | -7.04348200 | -2.04864000 | 2.14118900  |
| C | -7.37836600 | -2.99973900 | 1.17208100  |
| C | -6.65347600 | -3.00524100 | -0.02292200 |
| C | -5.61330000 | -2.10088600 | -0.26482900 |

|   |             |             |             |
|---|-------------|-------------|-------------|
| C | -5.69056200 | -0.11498900 | 3.02542400  |
| C | -8.47554800 | -4.00702700 | 1.42170800  |
| C | -4.86194600 | -2.15170200 | -1.57606900 |
| F | -1.82000600 | 2.69865500  | 1.29402700  |
| F | -1.06792500 | 2.13062000  | -0.81000700 |
| N | -1.80784300 | 0.36299400  | 0.67527800  |
| N | -3.44710900 | 1.99515900  | -0.34690300 |
| H | 0.27479800  | 2.35268300  | 1.75532300  |
| H | 2.96673600  | 2.60321600  | 1.61023000  |
| H | 6.60406400  | -1.00117600 | -0.65722300 |
| H | 6.05741700  | -3.38133000 | -1.81236000 |
| H | 7.59905100  | 2.02241000  | 3.07573700  |
| H | 6.90173600  | 3.73256500  | -0.79219500 |
| H | 6.34706500  | 0.24734100  | 3.88854500  |
| H | 5.81016800  | -0.91204900 | 2.66420900  |
| H | 4.65559200  | 0.21170600  | 3.37056100  |
| H | 8.89266900  | 4.38426000  | 0.48387900  |
| H | 9.28997000  | 3.57343900  | 2.00976800  |
| H | 8.09667100  | 4.87073800  | 1.98197000  |
| H | 4.95084200  | 1.20995800  | -2.12790000 |
| H | 5.24742400  | 2.95189400  | -2.21210300 |
| H | 3.79266000  | 2.32985500  | -1.42089100 |
| H | -0.27480600 | -2.35268000 | 1.75534400  |
| H | -2.96674300 | -2.60321200 | 1.61024500  |
| H | -6.60406200 | 1.00117600  | -0.65723100 |
| H | -6.05741000 | 3.38133000  | -1.81236800 |
| H | -7.59907400 | -2.02238700 | 3.07572600  |
| H | -6.90173900 | -3.73256300 | -0.79219400 |
| H | -6.34708600 | -0.24732000 | 3.88853300  |
| H | -5.81018000 | 0.91206400  | 2.66419600  |
| H | -4.65561100 | -0.21169000 | 3.37056000  |
| H | -8.89294600 | -4.38395700 | 0.48386800  |
| H | -9.28979900 | -3.57355400 | 2.01009700  |
| H | -8.09658600 | -4.87092100 | 1.98160300  |
| H | -4.95083800 | -1.20997000 | -2.12790000 |
| H | -5.24741300 | -2.95190700 | -2.21209300 |
| H | -3.79265500 | -2.32985800 | -1.42087800 |
| C | 3.31722500  | -4.23320700 | -1.52598500 |
| C | 2.35924100  | -4.92291400 | -0.76021000 |
| C | 3.69440600  | -4.76691900 | -2.77427600 |
| C | 1.79367900  | -6.10280700 | -1.23883400 |
| H | 2.07506900  | -4.54112800 | 0.21143600  |
| C | 3.12023900  | -5.94308000 | -3.24980200 |
| H | 4.42354200  | -4.24124900 | -3.38233600 |
| C | 2.16702100  | -6.61680400 | -2.48275300 |
| H | 1.06084800  | -6.62683900 | -0.63255700 |
| H | 3.41505100  | -6.33114000 | -4.22004500 |
| H | 1.72044900  | -7.53569100 | -2.85055600 |
| C | -3.31721700 | 4.23320200  | -1.52599200 |
| C | -2.35923700 | 4.92291200  | -0.76021400 |
| C | -3.69438900 | 4.76691000  | -2.77428700 |
| C | -1.79367200 | 6.10280300  | -1.23883800 |
| H | -2.07507100 | 4.54113000  | 0.21143600  |
| C | -3.12021800 | 5.94306800  | -3.24981400 |
| H | -4.42352100 | 4.24123700  | -3.38235000 |
| C | -2.16700500 | 6.61679500  | -2.48276200 |
| H | -1.06084400 | 6.62683700  | -0.63255900 |
| H | -3.41502500 | 6.33112400  | -4.22006100 |

H -1.72043100 7.53568000 -2.85056600  
SCF done: -2521.77515860 Hartree  
No imaginary Frequency.

**M<sup>+</sup>**

|   |             |             |             |
|---|-------------|-------------|-------------|
| B | -3.16168800 | 0.00258500  | 0.14080900  |
| C | -2.55903400 | 2.51517500  | -0.14497300 |
| C | -1.39851900 | 3.37709600  | -0.19809700 |
| C | -0.30212800 | 2.56344400  | -0.13539400 |
| C | -0.78939400 | 1.20742500  | -0.05322500 |
| C | -0.07161500 | 0.00024400  | -0.02705600 |
| C | -0.79103100 | -1.20611300 | -0.04888700 |
| C | -0.30553900 | -2.56312000 | -0.12556500 |
| C | -1.40301200 | -3.37552700 | -0.18530100 |
| C | -2.56239100 | -2.51185600 | -0.13570500 |
| C | 1.42110600  | -0.00065600 | 0.00136100  |
| C | 2.08562500  | 0.00151800  | 1.24782700  |
| C | 3.48267000  | -0.00388500 | 1.24860200  |
| C | 4.22908100  | -0.00838700 | 0.06506000  |
| C | 3.53798900  | -0.01397700 | -1.15146300 |
| C | 2.14240600  | -0.00883700 | -1.21328700 |
| C | 1.32668700  | 0.00517300  | 2.55678900  |
| C | 5.73733000  | 0.01594300  | 0.09998600  |
| C | 1.44242200  | -0.01555100 | -2.55438700 |
| F | -3.64389300 | 0.00507000  | 1.41797400  |
| F | -4.12065000 | 0.00160500  | -0.82723100 |
| N | -2.19273000 | 1.24529500  | -0.05685600 |
| N | -2.19440400 | -1.24211400 | -0.05256400 |
| H | -1.42837000 | 4.45507200  | -0.27771600 |
| H | 0.74247200  | 2.84044100  | -0.15632800 |
| H | 0.73869100  | -2.84167500 | -0.14500600 |
| H | -1.43428200 | -4.45377400 | -0.26060100 |
| H | -3.61002900 | -2.78859100 | -0.15686600 |
| H | 4.00237700  | -0.00595200 | 2.20364400  |
| H | 4.10054300  | -0.02389200 | -2.08185100 |
| H | 2.01730100  | 0.00685000  | 3.40349900  |
| H | 0.68161000  | -0.87608000 | 2.66310900  |
| H | 0.68299800  | 0.88795100  | 2.65859000  |
| H | 6.16724900  | -0.47929900 | -0.77592100 |
| H | 6.12571700  | -0.47514600 | 0.99737000  |
| H | 6.10912700  | 1.04870700  | 0.10634900  |
| H | 0.80269400  | -0.89809600 | -2.68253200 |
| H | 2.16912600  | -0.01919600 | -3.37032500 |
| H | 0.80242900  | 0.86555800  | -2.69065800 |
| H | -3.60630300 | 2.79321100  | -0.16724300 |

SCF done: -1030.36192126 Hartree  
No imaginary Frequency.

**1a<sup>+</sup>**

|   |             |             |             |
|---|-------------|-------------|-------------|
| B | 1.63866900  | 1.52017400  | 0.12607000  |
| C | 0.14387100  | 3.59890200  | -0.23405800 |
| C | -1.24610500 | 3.95841800  | -0.27631300 |
| C | -1.95865400 | 2.79366400  | -0.16240100 |
| C | -0.99975000 | 1.72292000  | -0.06296000 |
| C | -1.18156400 | 0.34812700  | 0.01151800  |
| C | -0.03624900 | -0.49206500 | 0.02638300  |
| C | -0.02085500 | -1.92288800 | -0.08686100 |

|   |             |             |             |
|---|-------------|-------------|-------------|
| C | 1.28664100  | -2.29782800 | -0.16238500 |
| C | 2.10131200  | -1.09968600 | -0.04965800 |
| C | -2.54907900 | -0.25061000 | 0.02745500  |
| C | -3.25885600 | -0.41503600 | -1.18300700 |
| C | -4.53262800 | -0.98747900 | -1.13040200 |
| C | -5.12150000 | -1.38603200 | 0.07412200  |
| C | -4.39181800 | -1.21020300 | 1.25454100  |
| C | -3.11162300 | -0.65108200 | 1.26023600  |
| C | -2.67205600 | -0.01029100 | -2.51840100 |
| C | -6.51356100 | -1.96817500 | 0.10151200  |
| C | -2.37195400 | -0.47149500 | 2.56802100  |
| F | 2.52558000  | 1.84546800  | -0.86412100 |
| F | 2.09116300  | 1.84066600  | 1.39173500  |
| N | 0.28165700  | 2.28378700  | -0.10845000 |
| N | 1.26768200  | -0.02243200 | 0.06068100  |
| H | -1.62644400 | 4.96521900  | -0.37873200 |
| H | -3.03146800 | 2.66136700  | -0.15532300 |
| H | -0.90214700 | -2.54747600 | -0.11616200 |
| H | 1.67382600  | -3.30359400 | -0.23530800 |
| H | -5.07848000 | -1.12911400 | -2.06015900 |
| H | -4.83077300 | -1.51651800 | 2.20104800  |
| H | -3.31929700 | -0.33483800 | -3.33708400 |
| H | -1.68211100 | -0.45163600 | -2.68577800 |
| H | -2.55663700 | 1.07707800  | -2.60616000 |
| H | -6.64227300 | -2.66247700 | 0.93755100  |
| H | -6.74387000 | -2.50156400 | -0.82589600 |
| H | -7.26457000 | -1.17595200 | 0.21708800  |
| H | -1.43660700 | -1.04438700 | 2.59668900  |
| H | -2.98537900 | -0.80690700 | 3.40801800  |
| H | -2.10993200 | 0.57807500  | 2.74945900  |
| H | 1.01026800  | 4.24701100  | -0.28302100 |
| C | 3.54039900  | -1.10044000 | -0.02949400 |
| C | 4.31394500  | -0.08661700 | 0.59663500  |
| C | 4.21576400  | -2.19438700 | -0.64160400 |
| C | 5.69695600  | -0.16673600 | 0.59206600  |
| H | 3.82382300  | 0.72339600  | 1.11847900  |
| C | 5.59830700  | -2.24950900 | -0.65909300 |
| H | 3.64727100  | -2.97047700 | -1.14180600 |
| C | 6.34484300  | -1.23696100 | -0.03955600 |
| H | 6.27929100  | 0.60292200  | 1.08832600  |
| H | 6.10169300  | -3.07557300 | -1.15089700 |
| H | 7.42970300  | -1.28717100 | -0.04261000 |

SCF done: -1261.49370053 Hartree

No imaginary Frequency.

## 7. Cellular study

### Darkeytotoxicity of 2g

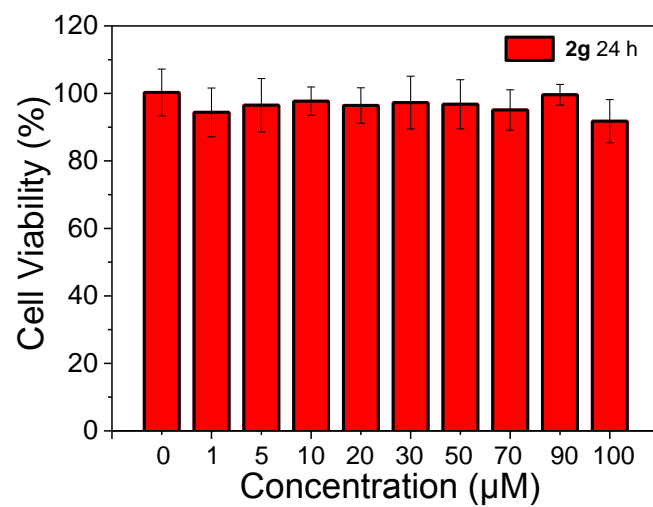

**Figure S12.** Cytotoxicity of HeLa cells treated with different concentrations of **2g** for 24 h as demonstrated by CCK-8 assay.

## 8. $^1\text{H}$ and $^{13}\text{C}$ NMR spectra for all new compounds

$^1\text{H}$  NMR (300 MHz) spectrum of **2a** in  $\text{CDCl}_3$

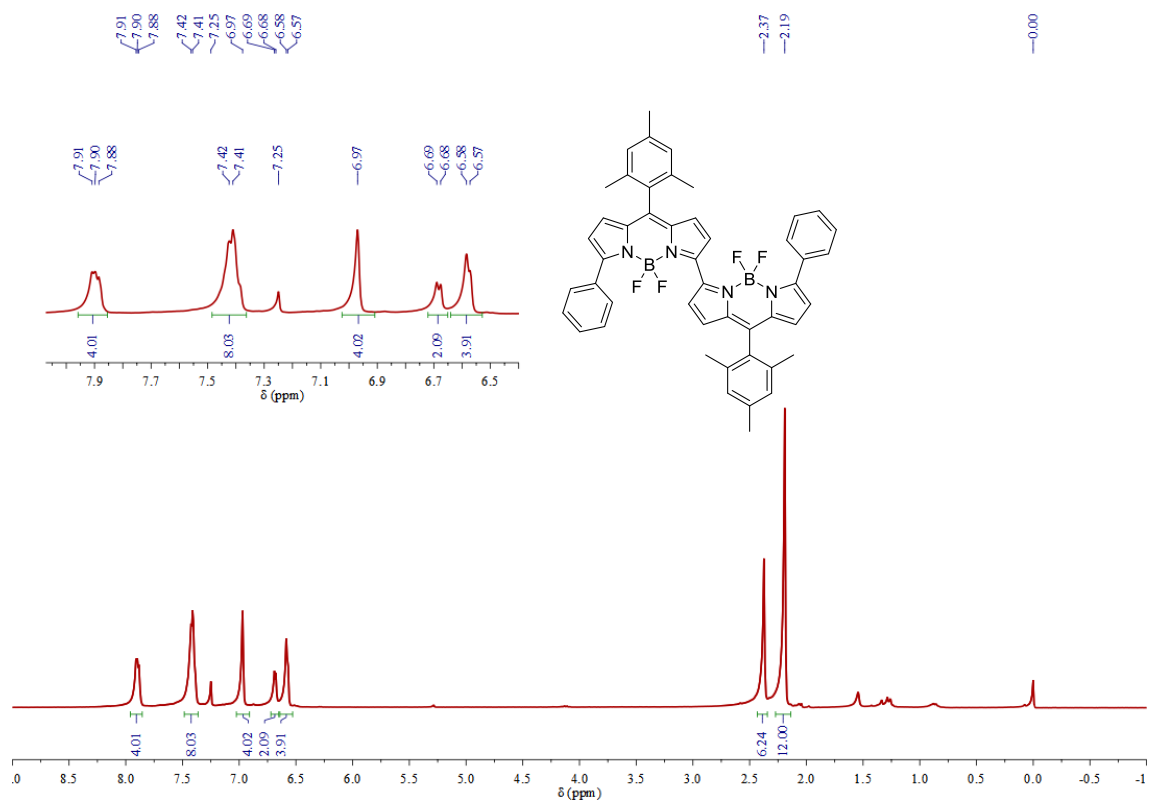

$^{13}\text{C}$  NMR (125 MHz) spectrum of **2a** in  $\text{CDCl}_3$

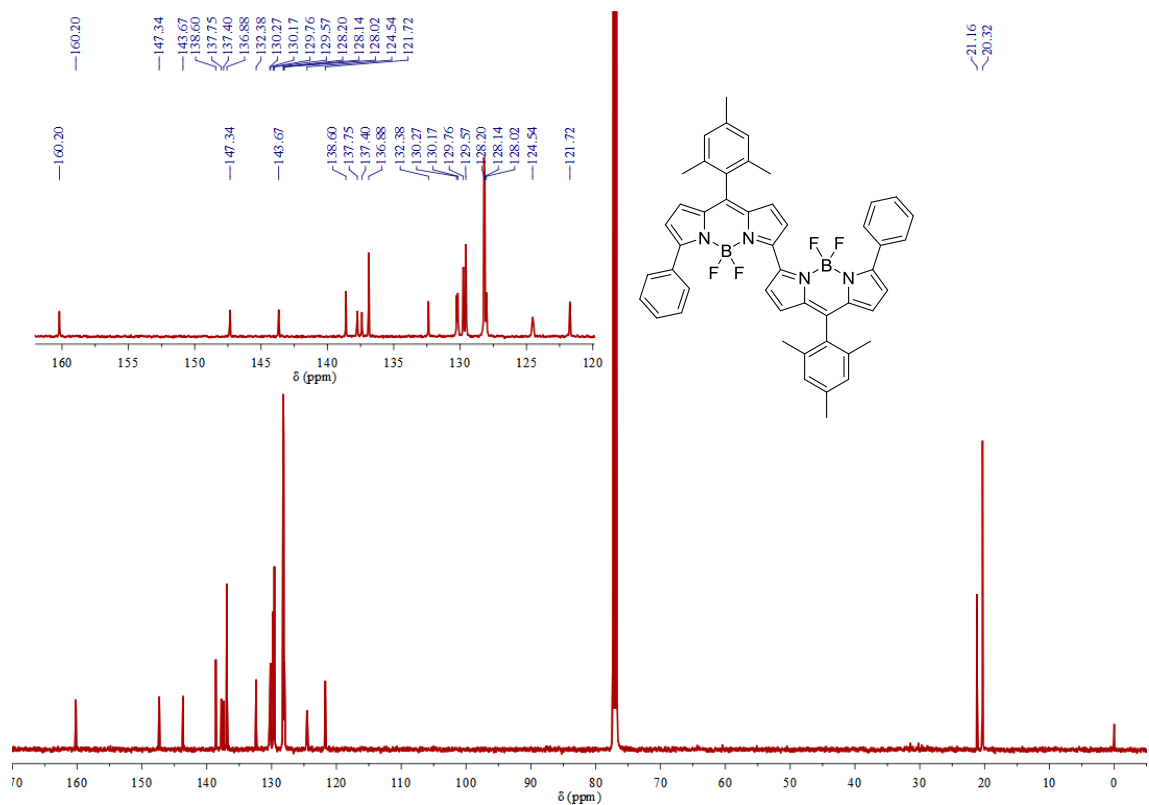



$^1\text{H}$  NMR (500 MHz) spectrum of **2b** in  $\text{CDCl}_3$

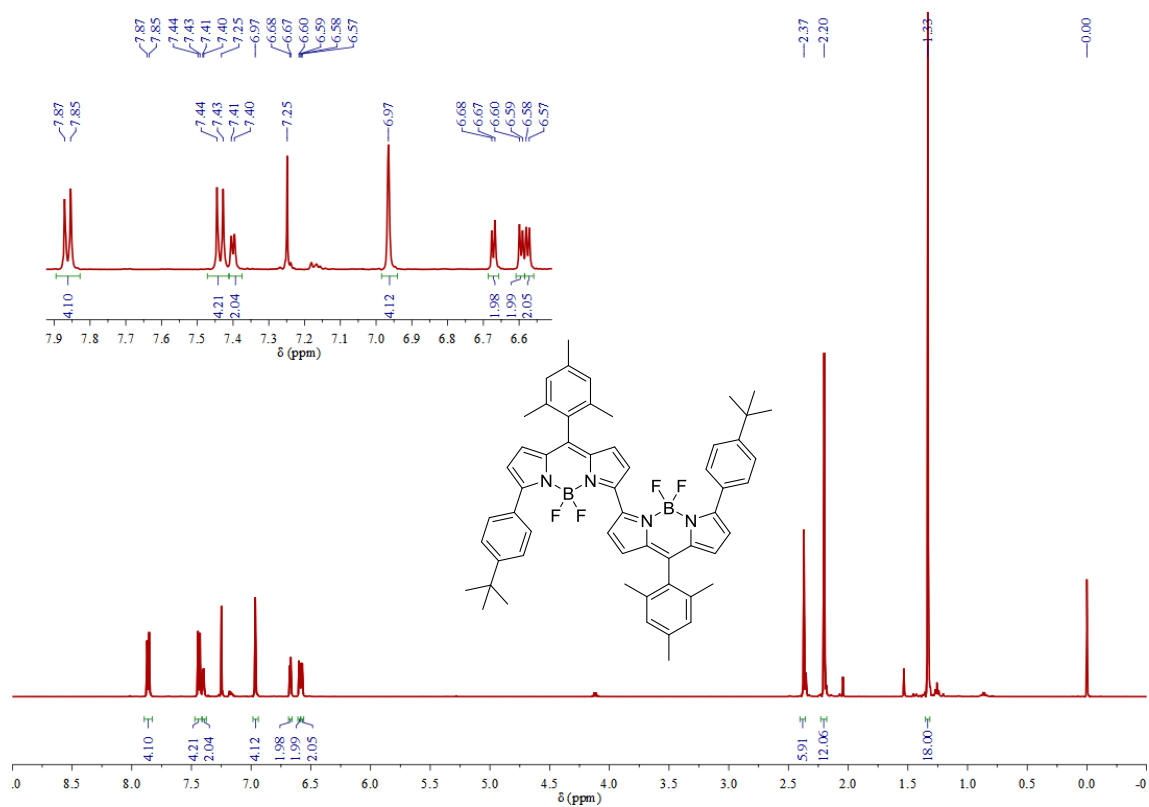

$^{13}\text{C}$  NMR (125 MHz) spectrum of **2b** in  $\text{CDCl}_3$

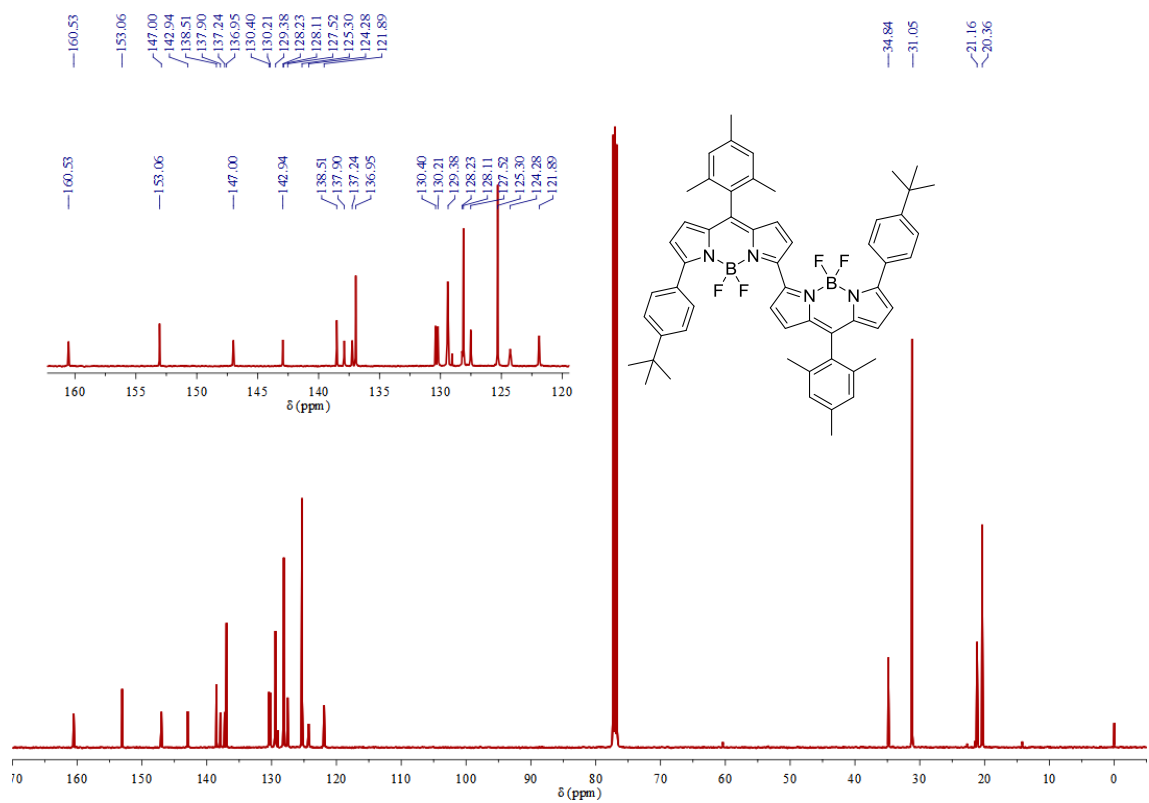

$^1\text{H}$  NMR (500 MHz) spectrum of **2c** in  $\text{CDCl}_3$

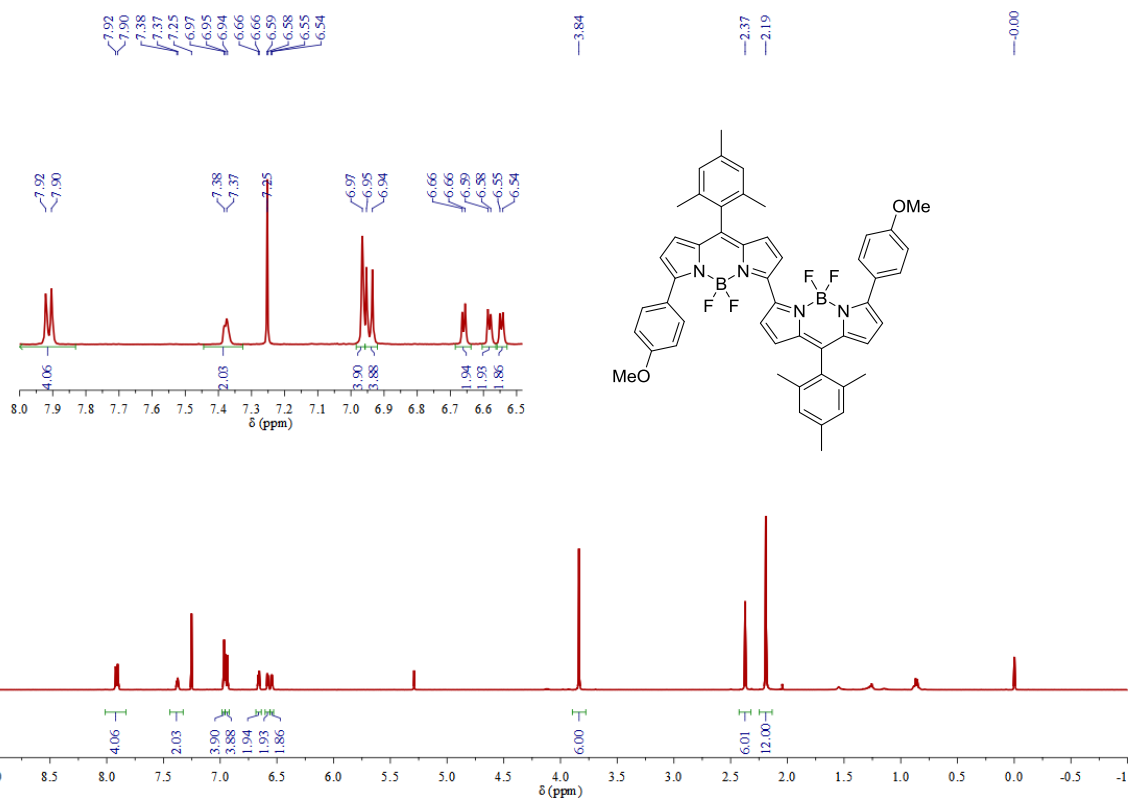

$^{13}\text{C}$  NMR (125 MHz) spectrum of **2c** in  $\text{CDCl}_3$

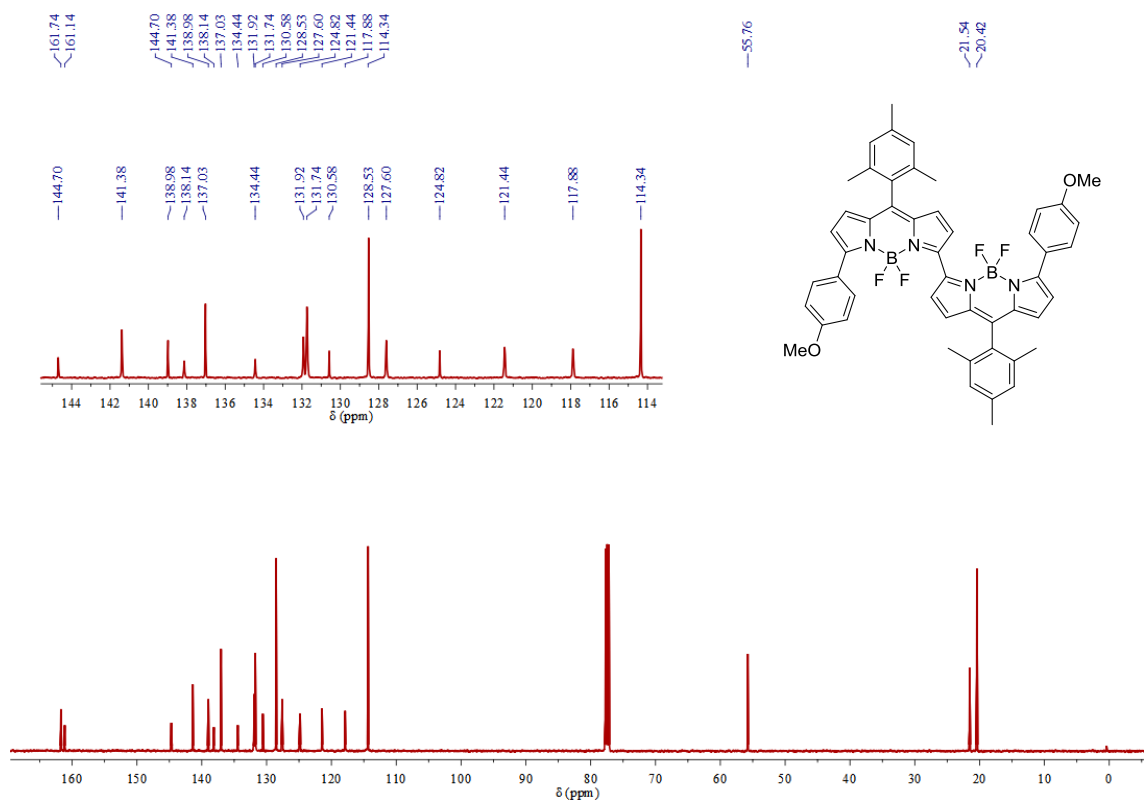

$^1\text{H}$  NMR (500 MHz) spectrum of **2d** in  $\text{CDCl}_3$

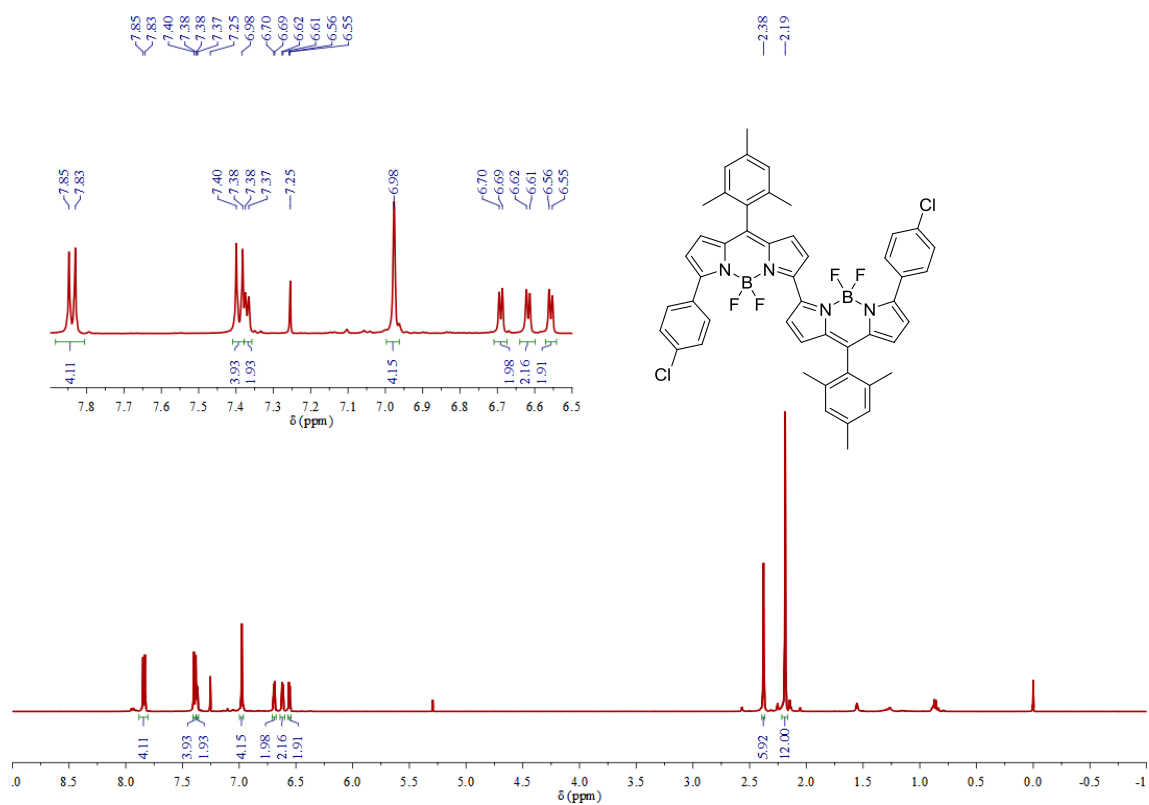

$^{13}\text{C}$  NMR (125 MHz) spectrum of **2d** in  $\text{CDCl}_3$

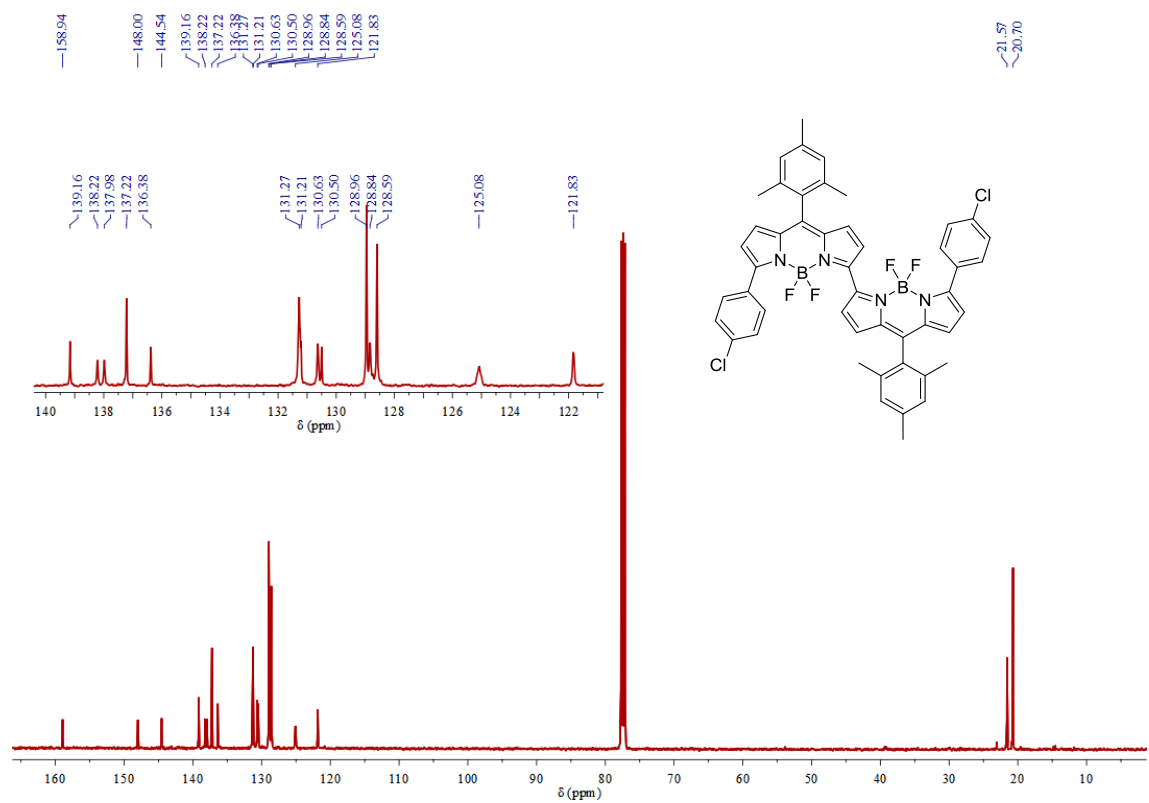

$^1\text{H}$  NMR (500 MHz) spectrum of **2e** in  $\text{CDCl}_3$

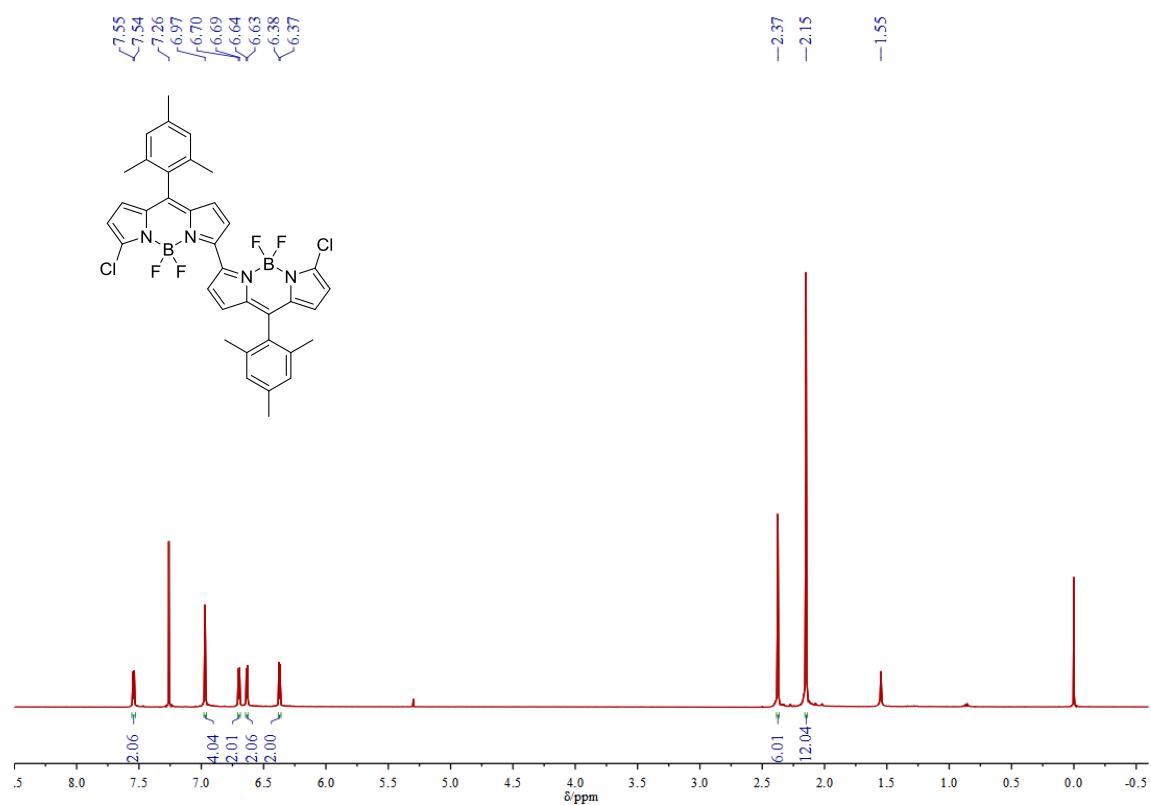

$^{13}\text{C}$  NMR (125 MHz) spectrum of **2e** in  $\text{CDCl}_3$

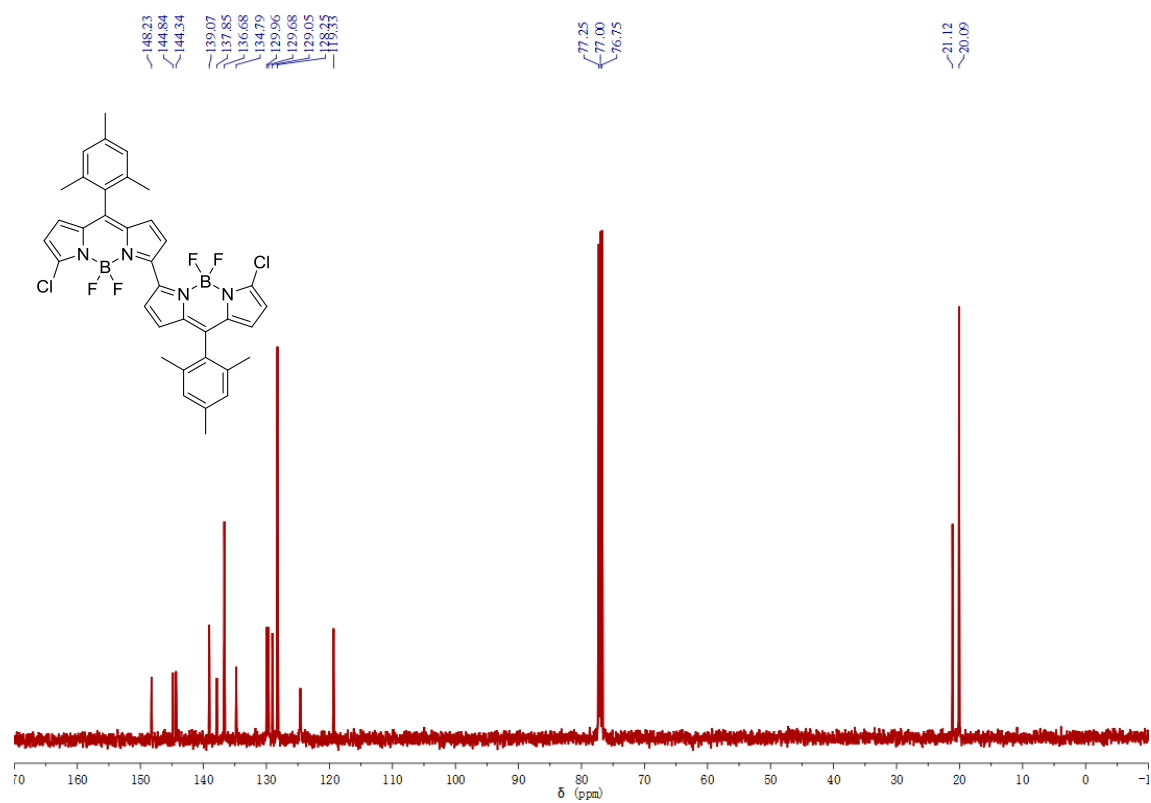

$^1\text{H}$  NMR (400 MHz) spectrum of **2f** in  $\text{CDCl}_3$

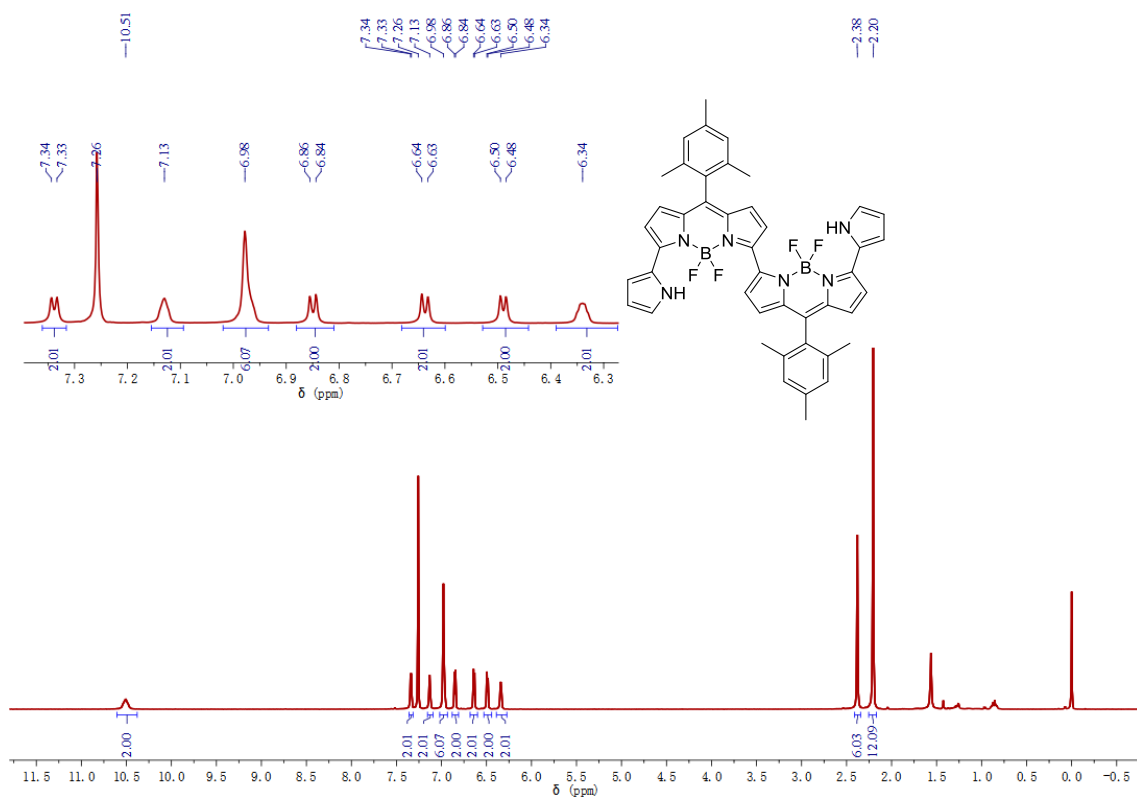

$^{13}\text{C}$  NMR (100 MHz) spectrum of **2f** in  $\text{CDCl}_3$

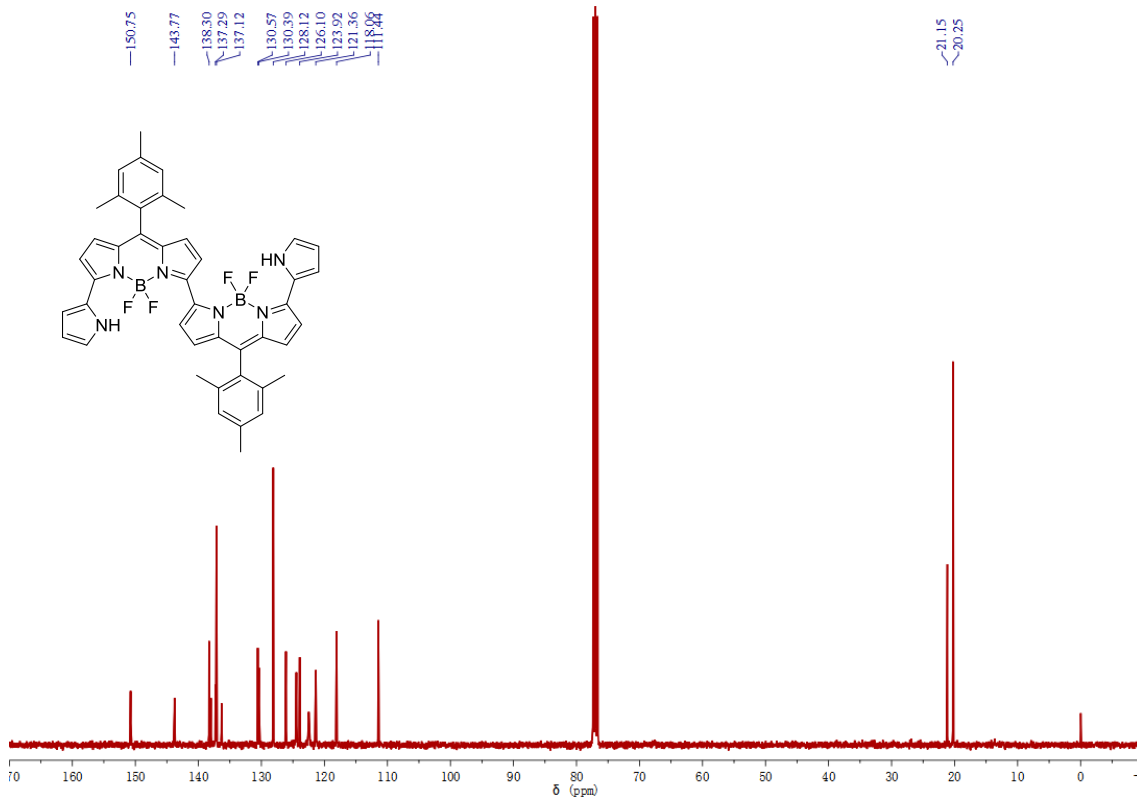

$^1\text{H}$  NMR (400 MHz) spectrum of **2g** in  $\text{CDCl}_3$

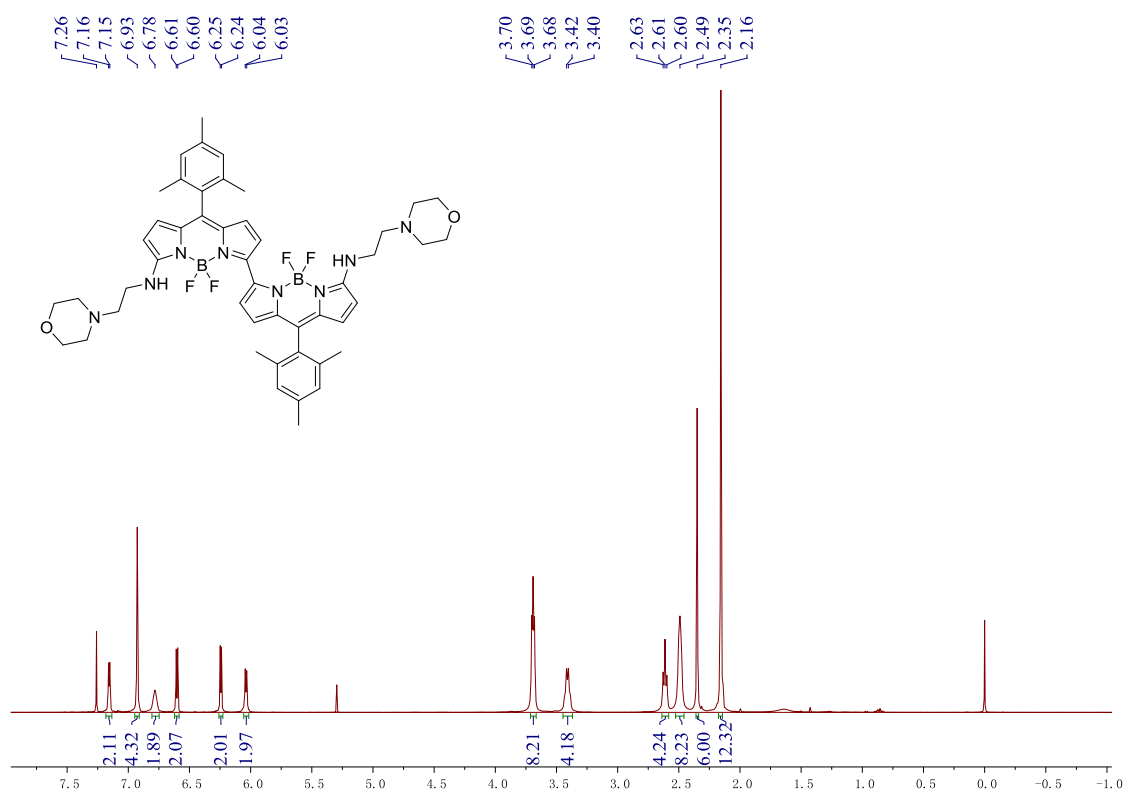

$^{13}\text{C}$  NMR (100 MHz) spectrum of **2g** in  $\text{CDCl}_3$

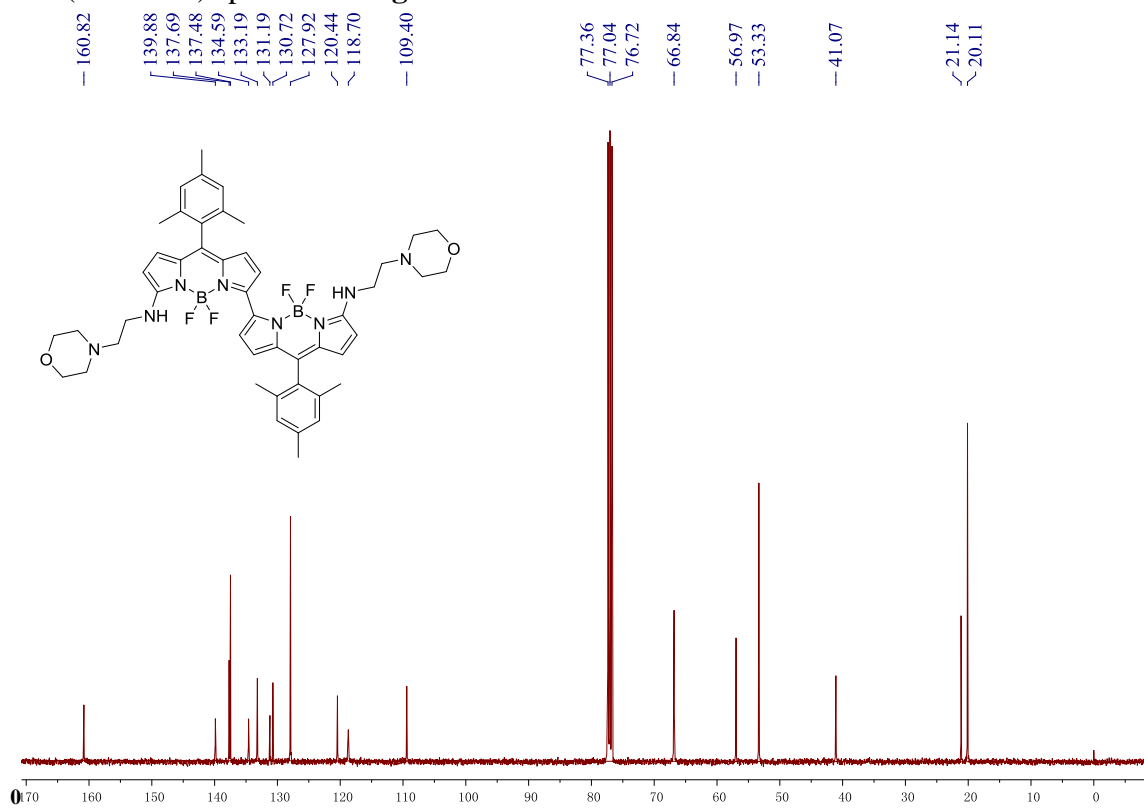

## 9. HRMS spectra for all new compounds

### HRMS for 2a

20150429\_APCI+ZX2 #10 RT: 0.14 AV: 1 NL: 1.64E5  
T: FTMS + c APCI corona Full ms [200.00-2000.00]

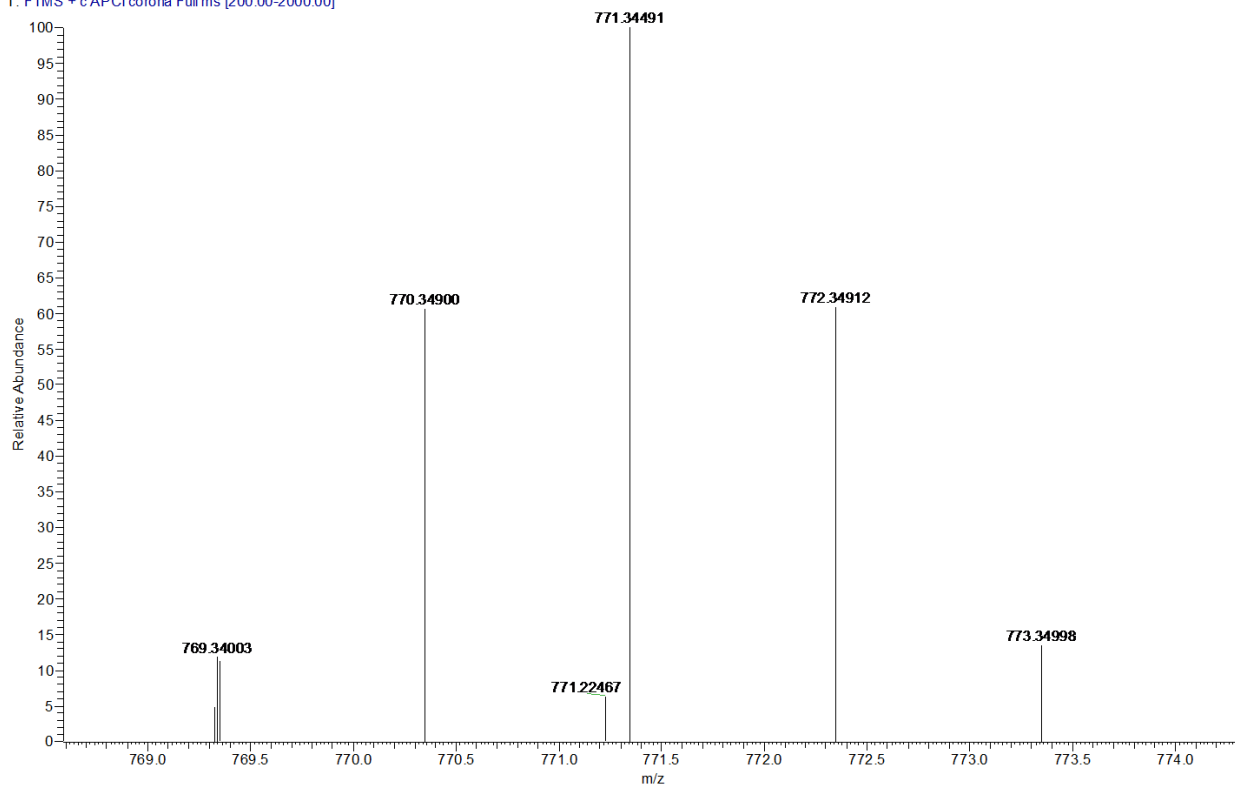

| m/z       | Intensity | Relative | Theo. Mass | Delta (mmu) | RDB equiv. | Composition                                                                  |
|-----------|-----------|----------|------------|-------------|------------|------------------------------------------------------------------------------|
| 771.34491 | 163652.3  | 100      | 771.3448   | 0.11        | 28.5       | C <sub>48</sub> H <sub>41</sub> N <sub>4</sub> B <sub>2</sub> F <sub>4</sub> |

# HRMS for 2b

20150429\_APC+ZX5 #38 RT: 0.55 AV: 1 NL: 2.26E4  
 T: FTMS + c APCI corona Full ms [200.00-2000.00]

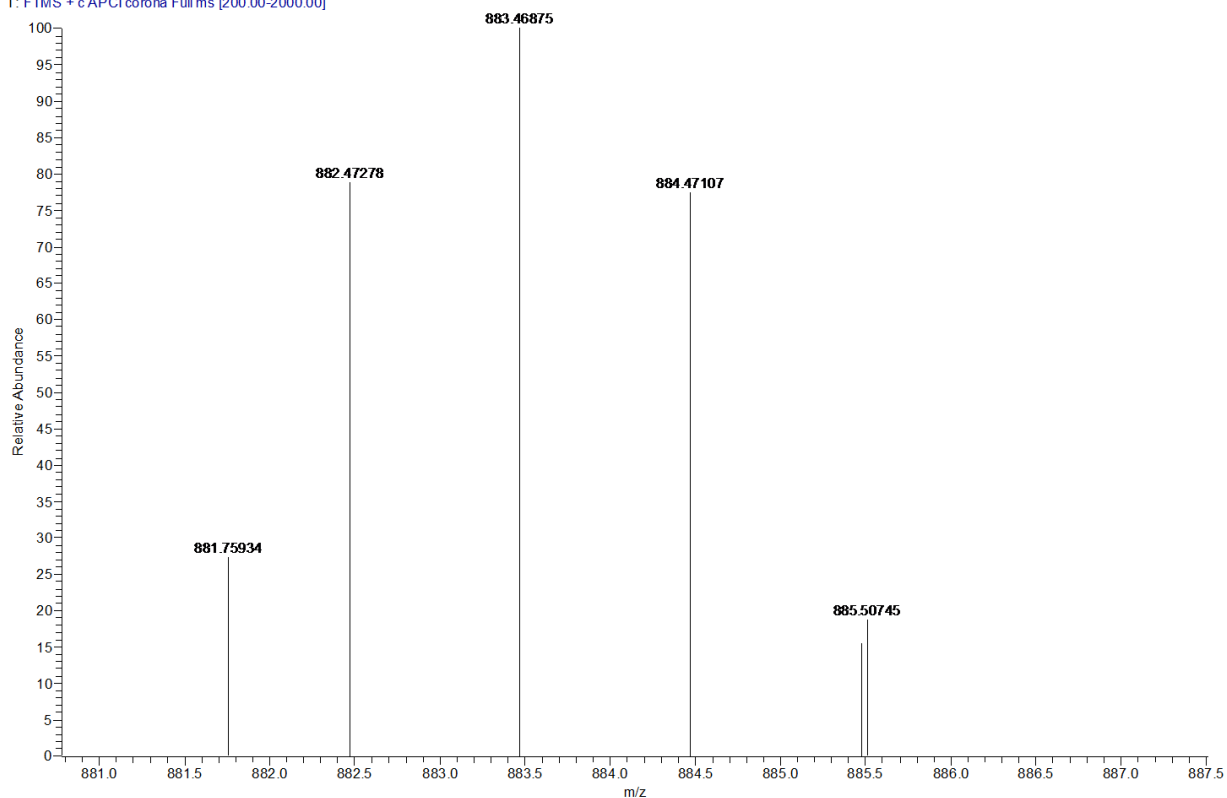

| m/z       | Intensity | Relative | Theo. Mass | Delta (mmu) | RDB equiv. | Composition                                                                  |
|-----------|-----------|----------|------------|-------------|------------|------------------------------------------------------------------------------|
| 883.47107 | 252870.8  | 100      | 883.4700   | -1.25       | 28.5       | C <sub>56</sub> H <sub>57</sub> N <sub>4</sub> B <sub>2</sub> F <sub>4</sub> |



# HRMS for 2c

20150429\_APCHzX3 #11 RT: 0.15 AV: 1 NL: 4.05E5  
 T: FTMS + c APCI corona Full ms [200.00-2000.00]

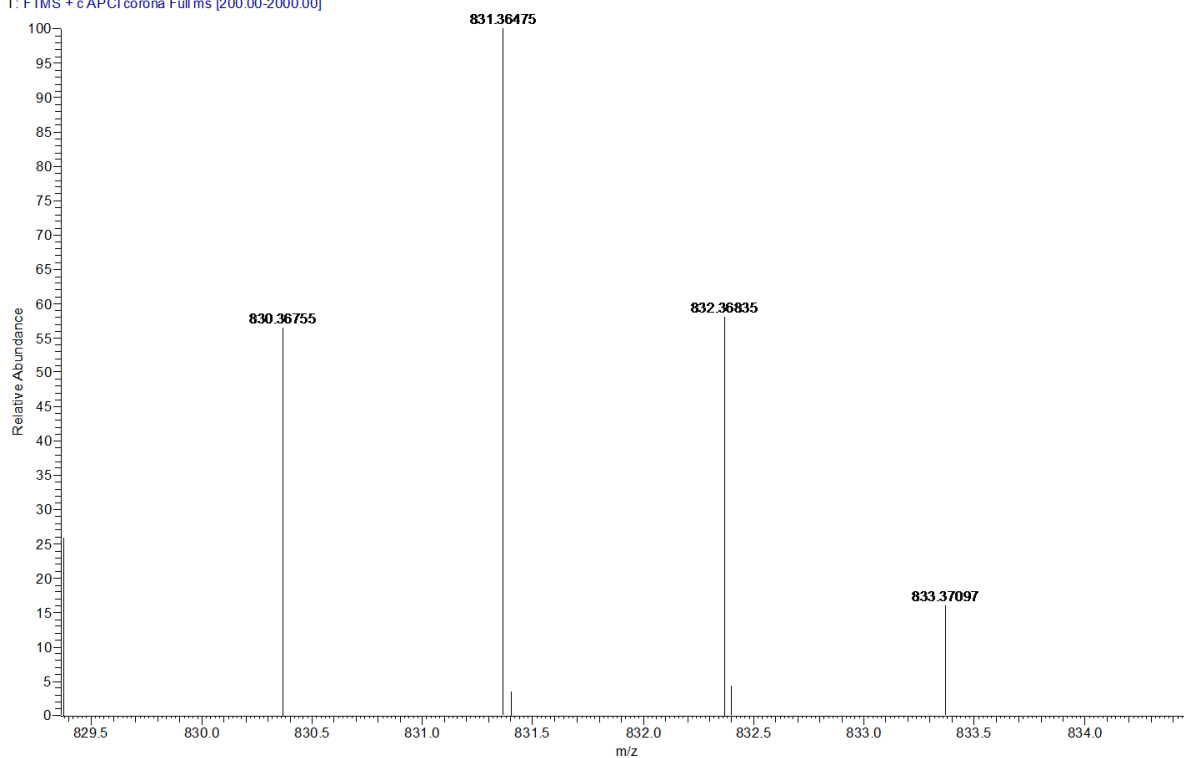

| m/z       | Intensity | Relative | Theo. Mass | Delta (mmu) | RDB equiv. | Composition                                                                                 |
|-----------|-----------|----------|------------|-------------|------------|---------------------------------------------------------------------------------------------|
| 831.36475 | 404509.6  | 100      | 831.36593  | -1.18       | 28.5       | C <sub>50</sub> H <sub>45</sub> O <sub>2</sub> N <sub>4</sub> B <sub>2</sub> F <sub>4</sub> |

# HRMS for 2d

20150505\_APC+ZX\_4\_2\_#9 RT: 0.12 AV: 1 NL: 7.96E4  
 T: FTMS + c APCI corona Full ms [200.00-1000.00]

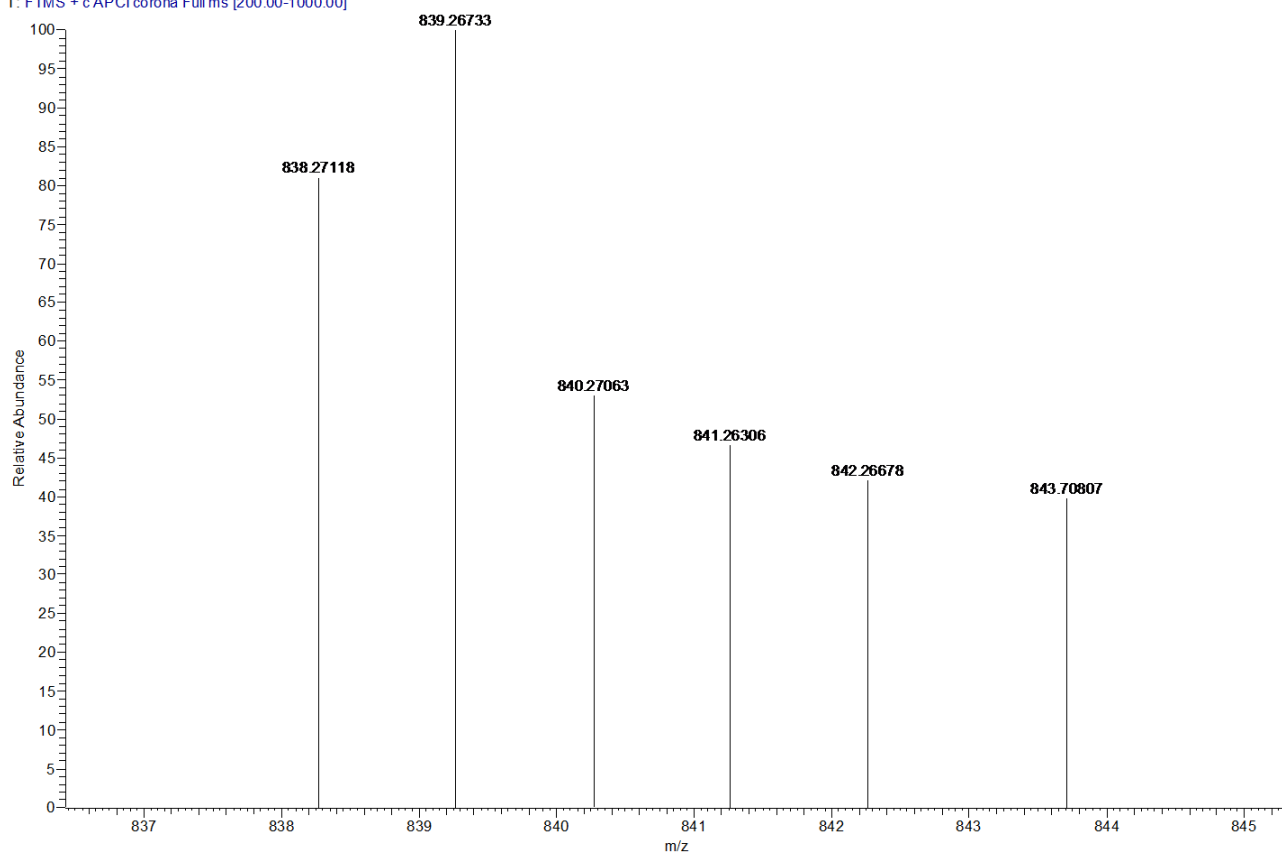

| m/z       | Intensity | Relative | Theo. Mass | Delta (mmu) | Composition                                                                                  |
|-----------|-----------|----------|------------|-------------|----------------------------------------------------------------------------------------------|
| 839.26733 | 79633.2   | 100      | 839.26685  | 0.48        | C <sub>48</sub> H <sub>39</sub> N <sub>4</sub> B <sub>2</sub> Cl <sub>2</sub> F <sub>4</sub> |

# HRMS for 2e

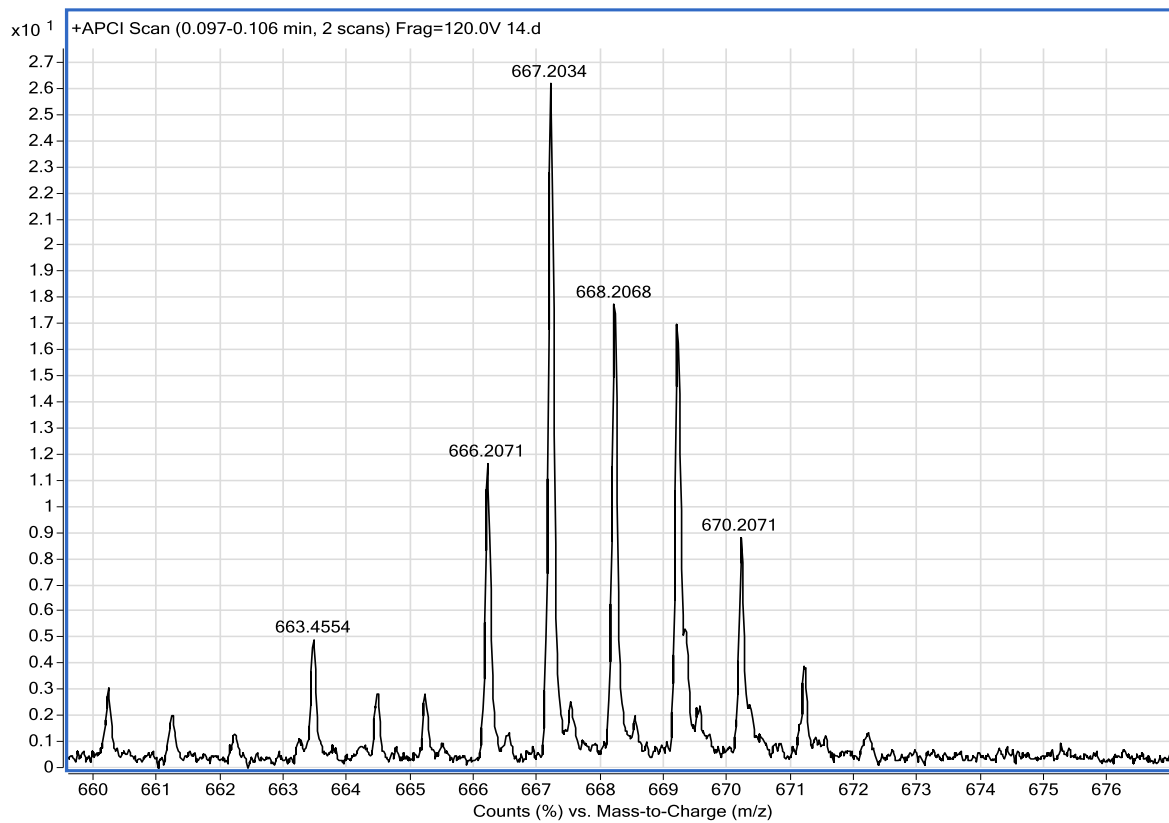

# HRMS for 2f

3-19 #17 RT: 0.19 AV: 1 NL: 1.84E5  
T: FTMS + p ESI Full lock ms [80.0000-1200.0000]

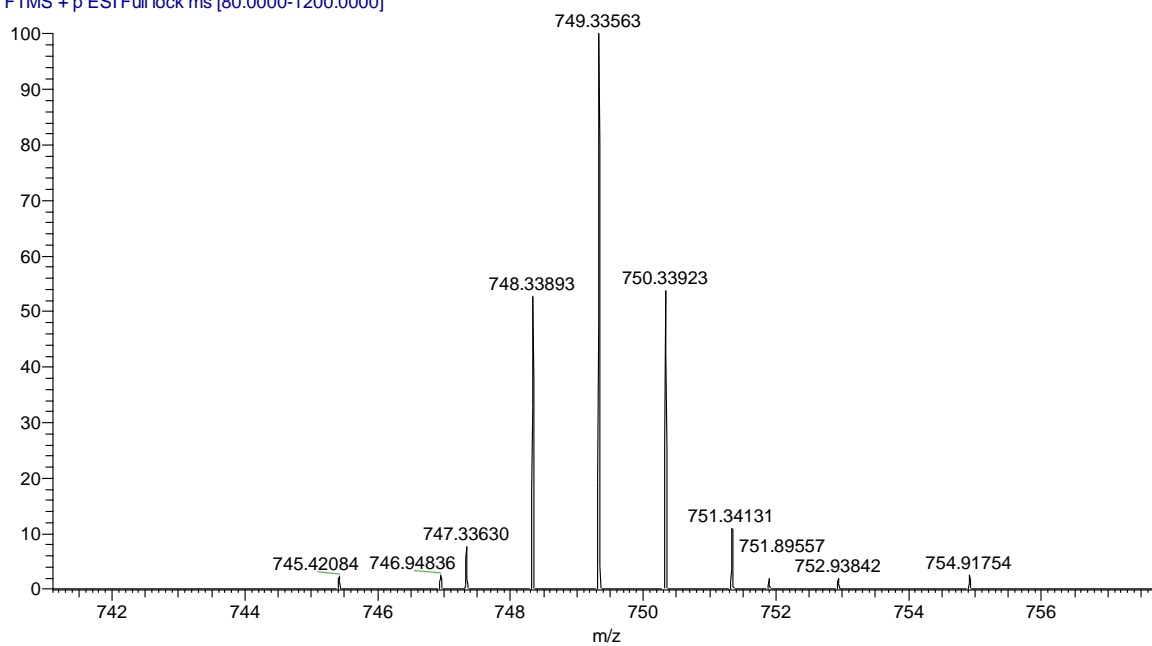

# HRMS of 2g

3-20 #21 RT: 0.23 AV: 1 NL: 6.19E4  
T: FTMS + p ESI Full lock ms [80.0000-1200.0000]

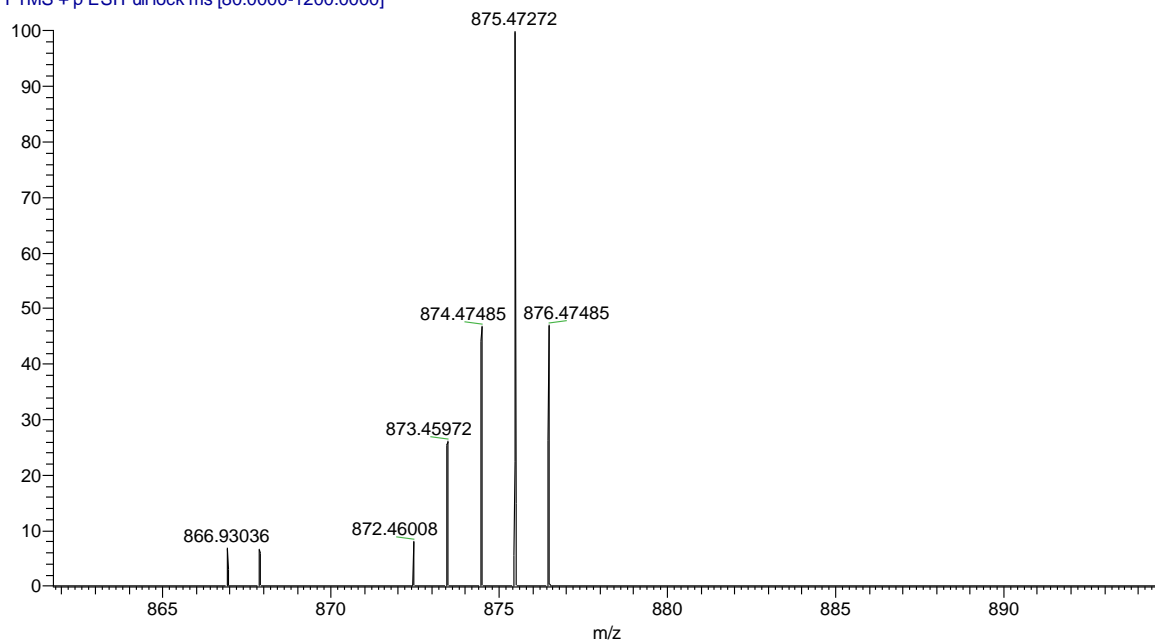

## References:

1. S. J. Isak, and E. M. Eyring, *J. Phys. Chem.* 1992, **96**, 1738.
2. R. Benson, and H. Kues, *Phys. Med. Biol.*, 1978, **23**, 159.
3. J. R. Lakowicz, *Principles of Fluorescence Spectroscopy*, 3rd ed.; Springer: New York, 2006.
4. SAINT V 6.01 (NT) *Software for the CCD Detector System*, Bruker Analytical X-ray Systems, Madison, WI 1999.
5. G. M. Sheldrick, SHELXS-90, *Program for the Solution of Crystal Structure*, University of Göttingen, Germany, 1990.
6. G. M. Sheldrick, *Acta Cryst.* 2015, **71**, 3.
7. SHELXTL 5.10 (PC/NT-Version), *Program library for Structure Solution and Molecular Graphics*, Bruker Analytical X-ray Systems, Madison, WI 1998.
8. X. Zhou, Q. Wu, Y. Yu, C. Yu, E. Hao, Y. Wei, X. Mu, and L. Jiao, *Org. Lett.* 2016, **18**, 736.
9. Q. Wu, Z. Kang, Q. Gong, X. Guo, H. Wang, D. Wang, L. Jiao, and E. Hao, *Org. Lett.* 2020, **22**, 7513.
10. Gaussian 09, Revision D.01, M. J. Frisch, G. W. Trucks, H. B. Schlegel, G. E. Scuseria, M. A. Robb, J. R. Cheeseman, G. Scalmani, V. Barone, B. Mennucci, G. A. Petersson, H. Nakatsuji, M. Caricato, X. Li, H. P. Hratchian, A. F. Izmaylov, J. Bloino, G. Zheng, J. L. Sonnenberg, M. Hada, M. Ehara, K. Toyota, R. Fukuda, J. Hasegawa, M. Ishida, T. Nakajima, Y. Honda, O. Kitao, H. Nakai, T. Vreven, J. A. Montgomery, Jr., J. E. Peralta, F. Ogliaro, M. Bearpark, J. J. Heyd, E. Brothers, K. N. Kudin, V. N. Staroverov, T. Keith, R. Kobayashi, J. Normand, K. Raghavachari, A. Rendell, J. C. Burant, S. S. Iyengar, J. Tomasi, M. Cossi, N. Rega, J. M. Millam, M. Klene, J. E. Knox, J. B. Cross, V. Bakken, C. Adamo, J. Jaramillo, R. Gomperts, R. E. Stratmann, O. Yazyev, A. J. Austin, R. Cammi, C. Pomelli, J. W. Ochterski, R. L. Martin, K. Morokuma, V. G. Zakrzewski, G. A. Voth, P. Salvador, J. J. Dannenberg, S. Dapprich, A. D. Daniels, O. Farkas, J. B. Foresman, J. V. Ortiz, J. Cioslowski, and D. J. Fox, Gaussian, Inc., Wallingford CT, 2013.
11. T. Wang, H. Ma, S. Zhang, Z. Li, M. Zhang, F. Li, F. Sun, J. Xiang, M. Ke and Q. Wang, *Org. Lett.*, 2018, **20**, 3591.
